# Supplementary material
Source: publisher site journal article supplement (https://www.dovepress.com/get_supplementary_file.php?f=142557a.xlsx)
Supplement: Supplementary file 1 [file get_supplementary_file.php]

## Sheet: Supplementary Table S1
Gene	Adjusted P	Adjusted HR	Low 95%CI	High 95%CI
AATF	0.0353688	1.85266	1.04315	3.29037
AATK-AS1	0.0341744	1.86751	1.04771	3.32877
ABCA13	0.0279889	0.555763	0.329117	0.938491
ACACB	0.0256434	0.532475	0.306134	0.926163
ACBD7	0.0357221	1.81013	1.04038	3.14937
ACHE	0.0396992	0.548433	0.309412	0.972097
ACSM1	0.0159597	1.96542	1.13444	3.40509
ACTG1P9	0.0104169	2.08533	1.18842	3.65913
ACTN3	0.0063627	2.10347	1.23299	3.58849
ACTR3B	0.0040707	2.31281	1.30524	4.09816
ACTR3C	0.0173805	1.91797	1.12144	3.28025
ADAM17	0.0360161	0.558847	0.324393	0.962752
ADAM29	0.015769	0.471712	0.256303	0.86816
ADAMTS7P1	0.0442149	0.551626	0.309013	0.984719
ADAMTS8	0.0409971	0.565923	0.327815	0.976981
ADGRA2	0.03401	0.541846	0.307493	0.954808
ADGRA3	0.037679	1.75386	1.03251	2.97915
ADGRD1	0.0158416	0.503425	0.288261	0.879193
ADGRE1	0.0370472	0.556718	0.321035	0.965424
ADH1B	0.0494071	0.586391	0.34433	0.998616
ADPGK-AS1	0.0202017	0.51647	0.295728	0.901984
ADRA1D	0.0166156	0.48981	0.273131	0.878384
ADRB1	0.000349711	2.76686	1.58379	4.83367
AGBL5-IT1	0.0320171	1.82071	1.05283	3.14862
AGPAT1	0.0218549	0.50506	0.281682	0.90558
AGPAT4-IT1	0.0147634	0.514341	0.301392	0.877749
AGTR1	0.00988448	0.461254	0.256229	0.830333
AHNAK2	0.041452	1.77717	1.02253	3.08873
AIRE	0.0427763	0.570579	0.331559	0.981907
AK4P3	0.0181631	1.88478	1.11398	3.18891
AKR1C1	0.00325263	0.446343	0.260819	0.76383
AMD1P3	0.0229307	0.526637	0.303071	0.915123
AMIGO2	0.0211466	1.96664	1.10664	3.49497
AMPD2	0.0465327	0.583165	0.34291	0.991753
AMY1A	0.00874458	2.32229	1.23703	4.35966
ANK2	0.0325003	0.521469	0.287097	0.947171
ANKEF1	0.0138831	2.00616	1.15209	3.49337
ANKRD18B	0.0149273	1.96221	1.14032	3.37647
ANKRD2	0.024204	1.9126	1.08824	3.36144
ANKRD22	0.042613	1.77692	1.01933	3.09757
ANLN	0.0239523	1.9232	1.09013	3.39289
ANTXRLP1	0.0343927	0.496611	0.259641	0.949858
ANXA2P1	0.0194525	2.04573	1.12233	3.72884
ANXA2P2	0.0473991	1.72792	1.0063	2.96703
ANXA2P3	0.00389712	2.28179	1.30314	3.99538
AOAH	0.00615032	0.465963	0.269829	0.804663
AP1S3	0.0328405	1.85426	1.05166	3.2694
AP4B1	0.0125666	0.488397	0.278207	0.857391
APEH	0.022816	1.94273	1.09674	3.44131
APITD1-CORT	0.0392376	1.85078	1.03084	3.32291
APOB	0.0197447	0.535918	0.3172	0.905447
APOC1	0.00927231	0.484864	0.28106	0.836453
ARAP3	0.0485994	0.587842	0.346689	0.996739
ARFGAP3	0.0457998	1.77156	1.01073	3.1051
ARGFXP2	0.00207567	0.413085	0.23531	0.725167
ARHGAP11B	0.0447234	1.77545	1.01361	3.10987
ARHGAP12	0.0429277	1.77285	1.0184	3.08622
ARHGAP15	0.046371	0.570019	0.327872	0.991001
ARHGAP30	0.0295679	0.548189	0.318979	0.942104
ARHGEF10L	0.0357711	1.93198	1.04475	3.57267
ARHGEF2	0.0404979	0.574085	0.337586	0.976265
ARHGEF28	0.0364756	1.87166	1.04023	3.36762
ARID5A	0.0072668	0.473707	0.274528	0.817398
ARIH2P1	0.0270696	0.530444	0.302336	0.930657
ARMC10P1	0.000244826	2.79002	1.61241	4.82769
ARMC4P1	0.00260103	2.34876	1.34733	4.09451
ARNTL2	0.00161421	2.40815	1.39459	4.15834
ARPC5	0.0280311	0.545717	0.317905	0.936779
ARSD	0.0177371	1.9546	1.12322	3.40136
ARV1	0.0196607	1.92457	1.1103	3.33601
AS3MT	0.019852	1.93085	1.10992	3.35896
ASF1B	0.00434112	2.24416	1.28772	3.91099
ASH2L	0.0432663	1.7694	1.01742	3.07717
ATF4P4	0.00471517	2.1938	1.27219	3.78307
ATIC	0.0256406	1.95546	1.08506	3.52406
ATL2	0.0159237	1.9673	1.13486	3.41036
ATL3	0.00213235	2.45065	1.38308	4.34224
ATOH7	0.0240407	1.85389	1.0845	3.16912
ATP6V0D2	0.028422	0.529959	0.300337	0.935138
ATP6V1B1	0.0392511	1.75604	1.02813	2.99931
ATXN1	0.00733785	0.44779	0.248885	0.805654
ATXN7L2	0.0412916	0.546978	0.306403	0.976443
AVEN	0.0318493	1.84183	1.05445	3.21714
AZIN1	0.0203446	1.9527	1.10942	3.43697
AZIN1-AS1	0.0158207	2.07255	1.14664	3.74613
AZIN2	0.0402502	0.553812	0.314874	0.974066
BAG6	0.0297612	0.552114	0.323128	0.943369
BAIAP3	0.0190203	1.95673	1.11656	3.42909
BATF2	0.00500923	2.24453	1.27616	3.94769
BCCIP	0.0103651	2.07782	1.18786	3.63454
BCDIN3D-AS1	0.018414	1.92376	1.11656	3.3145
BEX2	0.0416107	1.77337	1.02201	3.0771
BGN	0.024267	0.516318	0.29051	0.917644
BLNK	0.0100812	0.487179	0.281703	0.842533
BMP7	0.033635	0.551346	0.318321	0.954955
BMP8A	0.0146935	0.484957	0.271159	0.867326
BNIP3	0.0341992	1.7889	1.04428	3.06447
BOC	0.0348947	0.538522	0.303019	0.957054
BPGM	0.000845422	2.53456	1.46794	4.37621
BPI	0.0272502	0.55066	0.32424	0.935192
BRCC3	0.00994734	2.06089	1.18921	3.57151
BRD7P4	0.00788374	2.11898	1.21775	3.68722
BRD8	0.0153217	1.96664	1.1384	3.39745
BRD9P2	0.0257792	1.86703	1.07841	3.23235
BSPRY	0.015028	2.02369	1.14654	3.57189
BTBD9	0.00536986	0.446514	0.253112	0.787694
BTN3A1	0.035587	0.54909	0.313932	0.960399
BUD13P1	0.00497881	2.18902	1.26704	3.78187
C10orf105	0.00845669	0.469961	0.267902	0.824421
C10orf71	0.016302	1.93698	1.1294	3.32203
C11orf52	0.0228659	1.88104	1.09161	3.24137
C11orf58	0.0199934	1.92475	1.10866	3.34156
C11orf97	0.0153512	2.00418	1.14235	3.5162
C11orf98	0.0288557	1.83276	1.0645	3.15548
C12orf77	0.0419253	0.559382	0.319618	0.979007
C15orf56	0.0158401	2.01547	1.14052	3.56164
C17orf75	0.000961935	2.56903	1.46724	4.49819
C17orf80	0.0459869	1.7284	1.0098	2.95837
C19orf33	0.0270152	1.92496	1.07728	3.43966
C19orf44	0.0302076	1.84355	1.06028	3.20545
C19orf70	0.0185663	1.90402	1.11385	3.25475
C19orf84	0.00967436	0.495069	0.290644	0.843277
C1orf100	0.0418801	0.575557	0.338057	0.979911
C1orf146	0.042189	1.72944	1.01952	2.9337
C1orf167	0.00460955	0.453488	0.262408	0.783709
C1orf53	0.0233146	1.94446	1.09459	3.45421
C1orf56	0.0260517	1.8744	1.07783	3.25968
C1orf61	0.00860508	0.489276	0.287056	0.833953
C1orf64	0.0296726	0.523693	0.292323	0.938192
C2CD4B	0.036603	1.75634	1.03571	2.97837
C3orf70	0.0170429	0.496392	0.279215	0.882491
C5orf38	0.030501	0.549731	0.319704	0.945261
C6orf106	0.0246716	0.531812	0.306546	0.922615
C8B	0.0120885	2.05872	1.17132	3.61842
C8orf59	0.0498313	1.84077	1.00045	3.3869
C8orf89	0.0262466	0.54342	0.317369	0.930482
CA12	0.0159998	1.99916	1.13781	3.51257
CA3	0.0497446	0.576305	0.332331	0.999385
CALM3	0.00688294	0.465525	0.267373	0.810529
CALML6	0.0200357	2.05884	1.12026	3.78379
CAMK2N2	0.0368317	1.85296	1.03844	3.30636
CAPN1	0.0341552	1.86834	1.04781	3.33143
CARD17	0.0163211	0.515236	0.299901	0.885187
CARD6	0.018092	0.473515	0.254757	0.880119
CARMIL3	0.0442927	1.76057	1.01454	3.05517
CARMN	0.0222148	0.522757	0.299812	0.91149
CASC8	0.0474444	1.76509	1.00643	3.09566
CASP1P2	0.0252126	0.525419	0.299053	0.92313
CATSPERG	0.0158061	1.96074	1.13485	3.38769
CBFA2T2	0.027334	0.52837	0.299818	0.93115
CBR4	0.0415932	1.78659	1.02235	3.12213
CBWD2	0.0124527	2.00534	1.16195	3.4609
CBX6	0.0186128	0.5115	0.292647	0.894018
CCDC42	0.0402418	0.57078	0.334022	0.975352
CCDC78	0.0320584	1.83133	1.05322	3.1843
CCDC86	0.0106678	2.06391	1.18342	3.59953
CCDC91	0.0269156	1.89287	1.07562	3.33108
CCDC92	0.0439579	0.558331	0.31669	0.984349
CCDC94	0.0194488	1.91067	1.11006	3.28872
CCL5	0.0154966	0.514788	0.300697	0.881307
CCNB1	0.0233949	1.92892	1.09303	3.40404
CCNB2	0.0377505	1.7805	1.03319	3.06835
CCR5	0.0172292	0.493519	0.27601	0.882437
CCR6	0.0336217	0.540735	0.30666	0.953479
CCR9	0.00183753	0.396736	0.22177	0.709741
CCT8	0.0167216	2.01478	1.13509	3.57622
CCT8P1	0.0231052	0.533817	0.310594	0.91747
CD1E	0.0222779	0.537807	0.315959	0.915423
CD200R1	0.0174765	0.523549	0.307027	0.892767
CD226	0.0272654	0.532745	0.304598	0.931777
CD247	0.0433076	0.569848	0.330265	0.98323
CD3G	0.0489375	0.569513	0.325197	0.997381
CD68	0.0326501	0.553989	0.322241	0.952404
CD8A	0.0465415	0.569706	0.327374	0.99142
CD96	0.0263297	0.529604	0.30226	0.927943
CD99L2	0.0487809	0.570377	0.326308	0.997002
CDC6	0.033863	1.84704	1.04788	3.25565
CDCA7	0.0405612	0.554013	0.314821	0.974936
CDH11	0.0351425	0.553917	0.319713	0.959686
CDHR1	0.0430086	0.552142	0.310611	0.981488
CDKAL1	0.0245982	0.510456	0.283986	0.917529
CEACAM18	0.00366471	0.448685	0.261315	0.770403
CEACAM21	0.0421693	0.55997	0.320066	0.979695
CEBPA	0.0144716	0.489833	0.276451	0.867916
CECR1	0.00843954	0.467958	0.265952	0.823399
CELSR1	0.0230638	1.96534	1.09734	3.51993
CELSR3	0.0281583	1.85179	1.06822	3.21012
CELSR3-AS1	0.0171418	1.97024	1.12811	3.44101
CENPCP1	0.00298709	2.31417	1.32999	4.02665
CENPX	0.0126896	2.03431	1.16381	3.55591
CEP55	0.0436956	1.74851	1.01593	3.00937
CEP57L1	0.0316046	0.552896	0.322082	0.949119
CERKL	0.022772	0.523996	0.300442	0.913893
CES1P1	0.0146545	0.48612	0.272395	0.867537
CFAP53	0.0361476	1.78193	1.03801	3.059
CFAP58-AS1	0.0260066	0.556727	0.332426	0.932373
CHCHD5	0.00343806	2.2793	1.31249	3.95827
CHD1L	0.0444348	0.572718	0.332586	0.98623
CHD3	0.0156437	0.478878	0.263591	0.870001
CHMP3	0.04834	1.74964	1.00409	3.04876
CHRNA1	0.0333908	0.55966	0.327856	0.955357
CHRNA3	0.0425585	1.8259	1.02041	3.26722
CHRNB4	0.030192	1.83973	1.06012	3.19265
CKM	0.0359735	1.86242	1.04154	3.33027
CLDN11	0.00829485	0.45405	0.252649	0.816
CLDN19	0.0301884	0.526569	0.294845	0.940409
CLIC6	0.0206588	0.517898	0.296637	0.904197
CLIP1	0.0387833	0.566963	0.330988	0.971174
CLN6	0.0190626	1.91152	1.11207	3.2857
CLNK	0.0307001	0.543058	0.312143	0.9448
CLSTN3	0.0484057	0.563922	0.319287	0.995996
CLVS2	0.0492103	1.70409	1.00184	2.89857
CMA1	0.0311876	0.539478	0.307728	0.945757
CMTM8	0.0149667	2.07191	1.1522	3.72572
CNPPD1	0.047713	0.56792	0.324378	0.994315
CNTNAP3	0.0408231	1.74292	1.02346	2.96816
CNTNAP4	0.000278963	0.360171	0.207645	0.624735
COA5	0.0342313	1.84731	1.04667	3.26037
COL4A2	0.0448104	0.570677	0.329931	0.987094
COPS5	0.0144879	2.08339	1.15673	3.75242
COQ2	0.0383683	1.7717	1.03111	3.0442
COQ6	0.0325996	1.83452	1.05155	3.20048
COX10	0.0484019	1.70921	1.00377	2.91044
COX4I2	0.0491524	0.556142	0.309969	0.997824
COX5BP6	0.0313391	1.8189	1.05503	3.13581
CPSF7	0.0173247	1.94626	1.12464	3.36812
CREB3L3	0.0303395	0.536801	0.305693	0.942629
CRYBA4	0.0480106	0.57485	0.332058	0.995165
CSAG3	0.0229948	0.526702	0.303061	0.915375
CSDC2	0.0476842	1.73657	1.00565	2.99872
CSF1	0.0416925	0.55678	0.316908	0.978212
CSK	0.0265687	0.532299	0.304893	0.929317
CST2	0.0296189	0.548781	0.31958	0.942365
CST3	0.00882069	0.469485	0.266606	0.826752
CST7	0.0147687	0.495602	0.281866	0.87141
CSTA	0.0255423	0.540462	0.314932	0.9275
CT62	0.00394167	2.25854	1.29797	3.92996
CTBP2P4	0.00718687	2.06987	1.2178	3.51811
CTBP2P7	0.0391556	0.569957	0.334063	0.972426
CTH	0.0263528	1.84607	1.07471	3.17107
CUL9	0.0279911	0.543093	0.315063	0.936162
CWH43	0.0424259	1.74602	1.01923	2.99107
CXADR	0.0335926	1.82027	1.0476	3.16285
CXCL16	0.0203797	0.530849	0.310851	0.906548
CXCR4	0.0323122	0.52285	0.288742	0.946769
CXCR6	0.036843	0.549654	0.31337	0.964097
CXorf65	0.0156316	0.508817	0.294205	0.879981
CYB5A	0.0444062	1.76547	1.01432	3.0729
CYCSP45	0.0461323	1.71747	1.00932	2.92245
CYGB	0.0230676	0.524793	0.300931	0.915187
CYMP	0.0228111	0.533973	0.311124	0.91644
CYP26C1	0.0191098	0.493681	0.273559	0.890928
CYP2B7P	0.0295309	0.557337	0.329212	0.943539
CYSRT1	0.0229405	1.98744	1.09962	3.5921
CYTH3	0.0409676	0.563439	0.325028	0.976727
DAND5	0.0383722	1.7695	1.03103	3.0369
DBNDD1	0.0438423	1.78033	1.01605	3.11952
DCAF12L2	0.0175759	0.502104	0.284325	0.88669
DCAKD	0.0149457	1.96535	1.14056	3.38657
DCBLD2	0.0432218	1.77134	1.01757	3.08346
DCDC2C	0.0354561	0.563885	0.33061	0.961756
DEFB124	0.0469374	0.5732	0.331043	0.992493
DEPDC1B	0.00900242	2.07951	1.20052	3.60206
DEPDC4	0.0480971	1.7936	1.0049	3.2013
DGCR5	0.00752826	2.09454	1.2179	3.60219
DHRS11	0.0146085	1.93514	1.13917	3.28728
DHRS12	0.0293687	1.81576	1.06167	3.10548
DHRS4	0.0180399	1.9335	1.11949	3.33939
DHRS4L1	0.0190167	2.00391	1.12096	3.58234
DHRSX-IT1	0.0275688	0.530353	0.301687	0.932337
DLC1	0.0435904	0.543753	0.300895	0.982628
DLGAP1	0.0232137	0.538519	0.315576	0.918962
DLX3	0.00859012	2.05819	1.20139	3.52603
DMKN	0.0121906	2.13732	1.18014	3.87082
DMRT2	0.0262178	0.531279	0.304189	0.927902
DMXL1	0.045858	0.571073	0.329504	0.989746
DNAJC19	0.0391891	1.82334	1.03023	3.22702
DNAJC5B	0.0427571	0.570755	0.331777	0.981868
DNAJC9	0.043442	1.77415	1.01703	3.09491
DNAL4	0.0337513	1.84728	1.04827	3.25531
DND1P1	0.0199574	1.92644	1.10899	3.34644
DNM1P47	0.0392413	0.534095	0.29422	0.96954
DNM3	0.0259483	0.520022	0.292478	0.924592
DOCK11	0.0215898	0.512211	0.289457	0.906386
DOK6	0.0233869	0.515941	0.29116	0.914259
DPEP3	0.0153729	0.506698	0.292393	0.878073
DPH6	0.0176765	2.00724	1.12875	3.56945
DPP9	0.0400282	1.82885	1.02787	3.25402
DPY19L1P2	0.0361996	1.78552	1.03799	3.07142
DPY19L2P2	0.00249748	2.54956	1.38992	4.67672
DQX1	0.0100871	0.486596	0.281096	0.842328
DRAM2	0.00249489	0.420878	0.24019	0.737492
DRAP1	0.0464262	1.75522	1.00895	3.05346
DRD1	0.0299984	1.80009	1.05858	3.06103
DSG3	0.00247764	2.40363	1.36201	4.24184
DTWD1	0.0475669	1.7042	1.00574	2.88773
DUSP14	0.0395208	1.74096	1.02695	2.95138
DUSP4	0.0465755	1.73436	1.00838	2.98299
DYRK2	0.00246059	0.408183	0.22855	0.729002
DYRK3	0.0334853	0.565264	0.334098	0.956375
DYX1C1	0.0427076	1.77608	1.01905	3.09546
E2F3P1	0.0066951	0.445139	0.247988	0.799028
EBI3	0.0334852	0.544349	0.310747	0.95356
ECSIT	0.0176693	1.94908	1.12304	3.38272
EEF1B2P1	0.0429309	1.73263	1.01764	2.94997
EEF1E1	0.0427136	1.72642	1.01809	2.92755
EFCAB11	0.00538084	2.20212	1.26304	3.83942
EFCAB14	0.0199006	0.505967	0.28513	0.897844
EFCAB7	0.0172813	1.95346	1.12562	3.39015
EFHD1	0.0110935	0.500812	0.293703	0.853967
EFNA5	0.041138	1.76022	1.02301	3.02869
EFR3B	0.00523735	0.396012	0.206685	0.758767
EI24	0.0239424	1.96307	1.09313	3.52535
EID3	0.014505	0.509142	0.296338	0.874763
EIF2S2P4	0.00659015	2.11241	1.23163	3.62305
EIF2S3L	0.0309871	1.86122	1.05845	3.27283
EIF4EP1	0.0476582	1.7877	1.00601	3.17677
EIF5	0.0410574	1.77597	1.0236	3.08134
ELFN2	0.0204711	1.94204	1.10785	3.40435
ELMO1	0.0461951	0.549846	0.305398	0.989957
ELMO2	0.032013	0.540968	0.308515	0.948567
EN1	0.0196225	0.52137	0.301695	0.900997
ENG	0.013648	0.486724	0.274649	0.862559
ENOX1	0.024132	0.527351	0.302386	0.919683
ENPP2	0.00158751	0.380433	0.208833	0.693037
ENPP6	0.0484421	0.539646	0.29245	0.995788
ENPP7P11	0.0130383	0.480057	0.268962	0.856828
ENPP7P8	0.00193079	0.411413	0.234671	0.721267
EOMES	0.032255	0.539753	0.306946	0.949136
EPHA1-AS1	0.0127243	0.503837	0.293821	0.863966
EPO	0.0463378	1.76962	1.00931	3.10266
EPS15	0.0129124	0.484718	0.273871	0.857891
EPSTI1	0.0440109	1.74284	1.01501	2.99257
ERAP2	0.02808	1.85548	1.06874	3.22137
ERG	0.0155434	0.484513	0.269387	0.871433
ERGIC2	0.0470953	1.74474	1.00717	3.02245
ERMN	0.0205791	0.522124	0.301228	0.905009
ESX1	0.0378494	1.92257	1.03736	3.56317
EVL	0.00276188	0.396511	0.216361	0.72666
EXOC4	0.0393282	1.86851	1.03104	3.38621
EXOC8	0.028553	0.541054	0.312218	0.937612
EZR-AS1	0.0319597	1.81448	1.05272	3.12746
F2R	0.0410461	0.558154	0.319013	0.976561
FABP5	0.00991225	0.47657	0.271332	0.837052
FALEC	0.0465079	1.72913	1.00851	2.96467
FAM102B	0.0474861	0.571368	0.328494	0.993813
FAM105A	0.0367595	0.552706	0.316831	0.964185
FAM110B	0.0363297	0.528075	0.290432	0.960167
FAM111A	0.00718802	2.11162	1.22439	3.64174
FAM111B	0.0441685	1.73515	1.01449	2.96775
FAM124A	0.0323175	0.559983	0.329295	0.95228
FAM13C	0.0356178	0.517117	0.279536	0.956622
FAM150A	0.028601	1.8228	1.06482	3.12035
FAM151A	0.0190929	0.530137	0.31182	0.901307
FAM157B	0.00478673	0.464691	0.272848	0.79142
FAM159A	0.0177848	0.515666	0.2982	0.891722
FAM170B	0.045018	1.73336	1.01229	2.96806
FAM172A	0.00611345	0.444537	0.249001	0.793624
FAM172BP	0.00360445	0.421412	0.235511	0.754055
FAM185A	0.015067	1.97661	1.14108	3.42395
FAM198A	0.0342303	0.5335	0.29823	0.954372
FAM212B	0.0414383	0.569205	0.331159	0.978363
FAM216B	0.0356195	0.517114	0.279531	0.956627
FAM25A	0.00462671	2.33602	1.29854	4.20238
FAM26F	0.0189686	0.520322	0.301472	0.898044
FAM46A	0.0127667	0.465461	0.254968	0.849731
FAM57B	0.0233651	1.89524	1.09056	3.29367
FAM60CP	0.0126913	2.01242	1.16111	3.48789
FAM69C	0.0328618	0.553275	0.321234	0.952931
FAM78A	0.0493994	0.557798	0.311616	0.998467
FAM83H-AS1	0.0246486	1.88074	1.084	3.26309
FAM89A	0.0411052	0.552814	0.313008	0.976341
FAM95B1	0.0149331	2.04881	1.14992	3.65038
FARSA	0.0163684	1.98882	1.13451	3.48644
FASLG	0.0121711	0.496623	0.287339	0.858338
FAT3	0.0327642	0.52917	0.295017	0.94917
FAXC	0.0100402	2.05823	1.18803	3.56583
FBLIM1	0.00986721	0.484653	0.279577	0.840156
FBN1	0.0159829	0.506765	0.29152	0.880939
FBN2	0.0126795	0.48543	0.274997	0.85689
FBXL7	0.0206664	0.50811	0.286356	0.901591
FBXO22	0.0444035	1.71072	1.01352	2.88751
FCGRT	0.0271962	0.545299	0.318367	0.933989
FGD5P1	0.0181375	0.49935	0.280691	0.888344
FGF19	0.0469827	1.722	1.00727	2.94387
FGF3	0.0414062	1.74861	1.02202	2.99175
FGF5	0.0161727	1.91788	1.12807	3.26068
FGF7P8	0.0427555	0.580431	0.342935	0.982402
FGFBP1	0.0110742	2.00436	1.17217	3.42735
FHP1	0.0477103	1.76672	1.00576	3.10342
FIGNL2	0.00708086	0.453674	0.255225	0.806425
FILIP1L	0.021481	0.512324	0.289714	0.905985
FKBP2	0.0425637	1.75169	1.01898	3.01129
FKBP6	0.0306714	1.7844	1.05543	3.01686
FLJ41941	0.0307377	0.557579	0.328213	0.947235
FLJ43879	0.00244352	2.44602	1.37153	4.36231
FLRT1	0.0307379	1.88542	1.06061	3.35165
FLRT3	0.0461077	1.77058	1.00991	3.10418
FLVCR1-AS1	0.00514424	0.442274	0.249741	0.783236
FMC1	0.0237274	1.90976	1.0901	3.34574
FMNL3	0.0481904	0.564559	0.32018	0.995461
FMO6P	0.04021	0.548803	0.309364	0.97356
FNDC1	0.0306845	0.531117	0.299201	0.942798
FNDC1-IT1	0.0345189	0.539923	0.304903	0.956096
FNDC9	0.0137821	0.483687	0.271357	0.862159
FOXE3	0.01545	0.501322	0.286687	0.876651
FOXK1	0.0151482	0.477377	0.262854	0.866978
FOXO3	0.0456804	0.551675	0.307841	0.988644
FOXP4	0.0429644	0.584827	0.347882	0.983157
FOXP4-AS1	0.0254189	1.87657	1.08053	3.25905
FRMD3	0.0301965	0.555158	0.326066	0.945209
FTH1P12	0.00378705	2.35076	1.31803	4.19267
FYN	0.0224363	0.475071	0.250751	0.900067
FZD6	0.00566734	2.18492	1.25589	3.8012
FZD8	0.0313775	0.528794	0.296003	0.944665
GAB3	0.0326137	0.525544	0.2913	0.948151
GABRB1	0.015134	0.498444	0.28421	0.874167
GALNT6	0.0343487	0.563666	0.331435	0.958617
GALR3	0.0465126	1.74855	1.00867	3.03116
GAPDHP63	0.0263117	1.86313	1.07603	3.22597
GAPDHP73	0.0175722	1.90159	1.11874	3.23226
GAPT	0.0297391	0.530831	0.299875	0.939665
GAS7	0.0305984	0.532782	0.30108	0.942794
GBA3	0.0483379	0.568105	0.32408	0.995878
GBP7	0.0188114	1.9543	1.11743	3.41793
GGTA1P	0.0461721	0.578203	0.337443	0.990742
GHDC	0.0137794	1.96029	1.14736	3.34919
GHR	0.0155107	0.496802	0.281932	0.875431
GJB6	0.0469797	1.78579	1.00777	3.16447
GJC3	0.0352027	1.77811	1.04072	3.03797
GK-AS1	0.0124751	0.487159	0.277111	0.856422
GLI1	0.0208826	0.520523	0.299128	0.905777
GLUD1P7	0.0106081	2.0437	1.18121	3.53597
GLUD1P8	0.00438958	2.36367	1.30784	4.2719
GM2A	0.0401506	0.566084	0.328752	0.974751
GMCL1P2	0.0299354	0.559156	0.330828	0.945071
GMIP	0.00350741	0.435768	0.249497	0.761109
GNA15	0.00546674	2.21747	1.26433	3.88917
GNG10	0.0211267	1.90844	1.10176	3.30575
GNG2	0.0198652	0.512014	0.291485	0.899388
GNPTAB	0.0200712	0.523324	0.303177	0.903325
GOLGA2P11	0.0027213	2.38239	1.35053	4.20263
GOLGA7B	0.027645	1.80663	1.06724	3.05826
GOLGA8M	0.0494696	1.71605	1.00125	2.94115
GOLGA8Q	0.00741226	0.469675	0.270129	0.81663
GOT1	0.0480284	1.73844	1.00481	3.0077
GPAT2	0.0189106	0.525489	0.30707	0.899271
GPAT2P1	0.00631156	0.467811	0.271207	0.806937
GPC2	0.00348147	0.436701	0.250499	0.761309
GPC3	0.0376256	0.561243	0.325577	0.967492
GPC5	0.0385751	0.561777	0.325305	0.970147
GPD1	0.0429223	0.565792	0.325983	0.982018
GPNMB	0.010764	0.49367	0.286967	0.84926
GPR137B	0.0131511	0.494608	0.28353	0.862826
GPR141	0.0494929	0.566189	0.320975	0.998739
GPR143	0.0255651	1.84379	1.07762	3.15471
GPR18	0.041631	0.569564	0.331399	0.978888
GPR4	0.00845507	0.450519	0.248872	0.81555
GPR87	0.0306632	1.83725	1.05833	3.18945
GPRASP1	0.0317951	0.530701	0.297624	0.946309
GPRIN2	0.0165111	1.96869	1.13156	3.42511
GPS1	0.0342766	1.78921	1.04405	3.0662
GPSM3	0.00300529	0.400036	0.218408	0.732707
GPX8	0.020351	0.50548	0.284034	0.899577
GRAP2	0.0341451	0.54699	0.313004	0.955892
GRB7	0.0419715	1.80455	1.02166	3.18735
GRHL2	0.0374951	1.75687	1.03314	2.98759
GRK6	0.0380159	0.563865	0.328178	0.968816
GRM7-AS1	0.0406543	0.537516	0.296654	0.973939
GSN	0.0251734	0.524156	0.297752	0.922714
GTF3C3	0.0387546	1.85127	1.03234	3.31981
GUSBP9	0.0377736	0.560709	0.324839	0.967848
GVINP1	0.0440422	0.561666	0.320361	0.984728
GXYLT2	0.0300789	0.527079	0.295503	0.940135
GYPE	0.0278578	0.522115	0.292579	0.931726
GZMK	0.0133921	0.494902	0.283419	0.864191
HAGHL	0.049913	1.70912	1.0002	2.92049
HAUS2	0.0308209	1.88134	1.0601	3.33879
HCLS1	0.0179607	0.513617	0.295787	0.891864
HCP5B	0.0498774	0.578882	0.335203	0.999707
HDAC1	0.0369631	0.549462	0.313046	0.964422
HDAC1P1	0.0310393	1.79285	1.05466	3.0477
HERPUD2	0.0475662	1.7385	1.00595	3.00451
HEXIM1	0.0200938	1.9029	1.10619	3.27342
HEY1	0.021998	0.513877	0.290692	0.908417
HIST1H2BM	0.00674727	2.13691	1.23365	3.70152
HIST1H4C	0.0409699	1.7609	1.02349	3.02962
HIST1H4E	0.0204926	0.538105	0.318586	0.908883
HIST3H2BB	0.0352087	1.79497	1.04139	3.09389
HLCS	0.0188738	1.8896	1.1109	3.21412
HMBS	0.0219253	1.91819	1.09887	3.34839
HMCN1	0.0159247	0.506656	0.291495	0.880634
HMGB1P31	0.027937	1.93149	1.07394	3.47379
HMGB3P22	0.0295507	1.86295	1.06373	3.26265
HMGCS2	0.0352449	0.557591	0.323721	0.96042
HMGN1P36	0.0111801	2.03619	1.17555	3.5269
HMGN1P7	0.00528982	2.16197	1.25754	3.71687
HMX2	0.0133965	0.48314	0.271451	0.859913
HNRNPA1P39	0.0240298	1.86925	1.08572	3.21825
HNRNPA1P41	0.0238354	1.91102	1.08972	3.3513
HNRNPA1P6	0.042296	1.78462	1.02035	3.12134
HNRNPA3P3	0.0223498	1.88689	1.09436	3.25337
HOXA4	0.015767	0.49653	0.281259	0.876567
HOXA7	0.0219647	0.532377	0.310454	0.912941
HOXB4	0.0338134	0.548003	0.314446	0.955038
HOXB5	0.0291296	1.87071	1.06573	3.28372
HOXC12	0.0281022	0.506733	0.276232	0.929577
HP	0.0289245	0.543052	0.314006	0.939169
HPR	0.0309816	0.539339	0.307789	0.945086
HRAT92	0.0368804	1.83789	1.03777	3.25491
HS3ST6	0.00942293	2.05079	1.19248	3.52689
HSBP1L1	0.0193933	1.97381	1.11618	3.49039
HSD17B1	0.0104979	0.486604	0.280271	0.844836
HSD3BP4	0.0487586	1.72708	1.00298	2.97394
HSF2BP	0.0364604	1.80113	1.03777	3.12599
HSP90B3P	0.0295065	1.8155	1.06117	3.10607
HSPB8	0.00393321	0.431756	0.24395	0.764145
HTRA4	0.0229543	0.531925	0.308731	0.916474
HUS1B	0.0183952	1.97387	1.12152	3.47401
ICAM3	0.0349718	0.54206	0.306798	0.95773
ICK	0.0252271	0.524767	0.298341	0.92304
IFNA1	0.0405601	1.72902	1.02382	2.91997
IFNE	0.0455531	1.89943	1.01277	3.56236
IFNWP19	0.0330295	1.78782	1.04793	3.05013
IFRD2	0.0480514	1.73867	1.00475	3.00867
IFT74-AS1	0.00424748	0.428588	0.239775	0.766085
IGF2	0.0381371	0.528942	0.289698	0.965763
IGFBP5	0.0146895	0.495602	0.281993	0.871018
IGHD3-22	0.0456715	0.534093	0.288718	0.988005
IGHV1-14	0.0227778	0.52609	0.302672	0.914423
IGHV3-37	0.0114324	0.490401	0.282324	0.851832
IGHV3-38	0.0358218	0.533023	0.2962	0.959195
IGHV3-42	0.0258669	0.49911	0.270847	0.919745
IGHV3-47	0.023095	0.49643	0.271313	0.908334
IGHV3-49	0.00943766	0.472463	0.268223	0.832222
IGHV3-52	0.0316022	0.530696	0.297812	0.94569
IGHV3-54	0.0188627	0.507464	0.288084	0.893903
IGHV3-60	0.0104083	0.452206	0.246411	0.829875
IGHV3-71	0.0297907	0.543243	0.313296	0.941965
IGHV3OR16-15	0.035497	0.540744	0.304861	0.959139
IGHV3OR16-16	0.0445371	0.555348	0.312871	0.985747
IGHV7-27	0.0477344	0.590709	0.350775	0.994759
IGKV1D-17	0.00170273	0.394936	0.221053	0.705595
IGKV1D-27	0.0218236	0.521586	0.299056	0.909703
IGKV1D-35	0.0240975	0.510962	0.285098	0.915761
IGKV1D-43	0.00314404	0.410759	0.227585	0.741364
IGKV1OR22-5	0.00251401	0.368627	0.192956	0.704232
IGKV2-26	0.0190281	0.514217	0.29493	0.896549
IGKV2-29	0.0186706	0.507272	0.288149	0.893027
IGKV2-40	0.0144459	0.427881	0.216722	0.844781
IGKV2OR2-1	0.0382399	0.540726	0.302291	0.967227
IGKV2OR22-3	0.0324467	0.526895	0.292903	0.947816
IGLC6	0.0320538	0.551612	0.320197	0.950279
IGLL3P	0.0169856	0.515398	0.299079	0.888179
IGLV1-41	0.0307578	0.528829	0.296671	0.942658
IGLV2-18	0.0332937	0.538967	0.305058	0.952231
IGLV2-5	0.015952	0.482193	0.266439	0.872658
IGLV3-16	0.00651964	0.462079	0.264946	0.805888
IGLV5-48	0.0189292	0.519143	0.300274	0.897546
IGLVI-63	0.00587689	0.39762	0.206289	0.766406
IL16	0.0415724	0.549008	0.308391	0.977363
IL18	0.0359151	1.85079	1.0413	3.28954
IL31RA	0.0445905	1.74296	1.01352	2.99739
IMPDH1P6	0.0107929	0.489087	0.282216	0.847599
INIP	0.0303229	0.530044	0.298421	0.941442
INSR	0.0350295	1.81318	1.04268	3.15304
INTS3	0.0494986	0.569809	0.325084	0.998767
IQCH	0.0385352	1.76103	1.0303	3.01002
IQSEC1	0.00524064	0.427351	0.23528	0.776219
IRGM	0.0380642	0.571431	0.33675	0.969659
ISCA2P1	0.0310806	1.79444	1.05461	3.05326
ISLR2	0.0253936	0.531845	0.305741	0.925159
ITGA11	0.040584	0.575251	0.338852	0.976573
ITGA7	0.0487133	0.578413	0.335597	0.996914
ITGAD	0.00479995	0.456371	0.264575	0.787202
ITGB7	0.0325414	0.559865	0.328936	0.952917
ITLN1	0.0242426	0.532609	0.307914	0.921271
ITSN1	0.0311395	0.530428	0.297995	0.944158
JAKMIP2	0.00446522	0.454618	0.264028	0.782784
KARSP2	0.0112297	0.473054	0.265223	0.843744
KAT5	0.0360031	1.79561	1.03896	3.10332
KCCAT333	0.000144975	0.281494	0.14638	0.541324
KCNA3	0.0158611	0.495966	0.280537	0.876828
KCNAB2	0.0100667	0.477498	0.271945	0.838421
KCNJ10	0.00119775	0.393498	0.223805	0.691858
KCNJ2-AS1	0.0190295	0.519906	0.300945	0.898176
KCNMA1-AS1	0.0323817	1.80185	1.0507	3.09002
KCNV2	0.0388203	1.79715	1.03057	3.13395
KCTD14	0.0228549	1.92938	1.09551	3.39797
KCTD17	0.0369536	0.532502	0.294586	0.962566
KCTD20	0.0175409	0.484603	0.266544	0.881053
KDM4D	0.0156246	0.505094	0.290329	0.878726
KIAA0513	0.000921241	0.371304	0.206645	0.667169
KIAA0895	0.00518205	2.14659	1.25648	3.66727
KIAA1211	0.0247431	0.504015	0.277147	0.916591
KIAA1549	0.0164092	1.96012	1.13125	3.3963
KIAA1683	0.0499665	0.578106	0.334233	0.99992
KIF21A	0.0248777	1.87162	1.08238	3.23634
KIZ	0.0125019	0.476826	0.266662	0.852625
KLF10	0.0467375	1.68954	1.0076	2.83301
KLF12	0.0161244	0.500479	0.284781	0.879552
KLF8	0.0494549	0.561186	0.315364	0.998623
KLHL6	0.0155518	0.498649	0.283769	0.876245
KLRB1	0.0251906	0.539952	0.314782	0.926191
KLRF2	0.0372148	0.561549	0.326304	0.966389
KRT13	0.0291874	1.82076	1.0626	3.11986
KRT17P3	0.0384842	1.77765	1.03096	3.06513
KRT18P17	0.0207044	1.94372	1.10685	3.41332
KRT18P19	0.00297033	2.47732	1.36162	4.50724
KRT18P28	0.0159526	2.09138	1.14772	3.8109
KRT19	0.029676	1.83919	1.06193	3.18535
KRT86	0.0397867	1.80938	1.02807	3.18446
KRT8P20	0.0173084	1.91924	1.12196	3.28308
KRT8P26	0.00507769	2.19968	1.26733	3.81795
KRT8P9	0.0215949	1.96332	1.10417	3.49096
LAMP5	0.012685	0.485158	0.274713	0.856817
LAMP5-AS1	0.041163	0.578609	0.342218	0.978288
LARGE2	0.0112289	2.09674	1.18301	3.71622
LAS1L	0.0410609	1.8929	1.02625	3.49142
LCK	0.0371115	0.545483	0.308526	0.964429
LCP1	0.0255797	0.521914	0.294901	0.92368
LDHAP2	0.00676879	0.410064	0.215104	0.781729
LDHAP7	0.0125333	2.20062	1.1848	4.08737
LEF1	0.0313927	0.512784	0.2791	0.942125
LEF1-AS1	0.0259936	0.527444	0.300324	0.926324
LEFTY2	0.014445	0.502999	0.290025	0.872367
LENG9	0.0162942	1.9799	1.13401	3.45677
LEPR	0.0475153	0.561663	0.317466	0.993699
LGALS4	0.00973069	0.48173	0.276903	0.83807
LHFPL5	0.0148365	1.96654	1.14137	3.38826
LILRA4	0.0045485	0.443087	0.25252	0.777467
LILRB4	0.040093	0.56858	0.331643	0.974792
LIN28B	0.0393098	1.91607	1.03237	3.55622
LINP1	0.0266362	1.86178	1.07467	3.2254
LIPE	0.0428181	0.572209	0.333389	0.982105
LMCD1	0.0361994	0.555768	0.32077	0.962927
LMX1A	0.0417058	0.563245	0.324158	0.978672
LOC100421166	0.0191417	0.525242	0.306487	0.900136
LPAR4	0.0402827	0.547233	0.307571	0.973639
LPIN1	0.0184144	0.494032	0.274863	0.887961
LRP1	0.02164	0.509151	0.286198	0.905788
LRRC32	0.0103494	0.482126	0.276031	0.842101
LRRC8C	0.0151276	0.486728	0.272263	0.870128
LRRK1	0.0487975	0.574527	0.331047	0.997081
LRTM1	0.0457239	0.569721	0.328071	0.989365
LSM1	0.00223639	2.46856	1.38301	4.40618
LSM4	0.0443547	1.75069	1.01424	3.0219
LSP1	0.0336971	0.554321	0.32157	0.955535
LTBP4	0.0301404	0.537645	0.306817	0.942132
LY6D	0.0175964	1.9722	1.12575	3.4551
LYPLA1	0.0324549	1.81361	1.05103	3.12948
LYZ	0.0417746	0.572629	0.334782	0.979457
LZTS1	0.000343346	0.354015	0.200509	0.625041
MAATS1	0.0393967	1.76874	1.02808	3.04297
MACROD1	0.00960158	2.12503	1.20121	3.75931
MAFA-AS1	0.0402396	1.78405	1.02611	3.10186
MAGOHB	0.031333	1.9213	1.06024	3.48165
MAGT1	0.0304561	1.88087	1.0614	3.33301
MANSC4	0.0436324	0.528647	0.284603	0.981954
MAP1A	0.0452005	0.561485	0.31918	0.987736
MAP1LC3B2	0.0251998	0.53768	0.312291	0.925737
MAP2K2	0.024189	1.89028	1.08664	3.28825
MAP3K14	0.0278805	0.53933	0.311067	0.935096
MAPKAPK2	0.0311098	0.558754	0.329147	0.948531
MAS1L	0.0258106	0.491853	0.263555	0.917908
MCM4	0.00479149	2.3203	1.29285	4.16427
MCMDC2	0.0171395	1.91603	1.12254	3.27041
MDGA2	0.0278169	0.542885	0.315025	0.935556
MECR	0.0331856	1.85088	1.05033	3.26162
MED12	0.0106508	0.463065	0.256477	0.836058
MEI1	0.00312936	0.42377	0.239769	0.748972
MELTF	0.00930571	2.10635	1.20143	3.69283
METTL1	0.0340613	1.79789	1.0451	3.09292
METTL21B	0.0268235	1.90948	1.07706	3.38525
METTL26	0.0219421	1.89553	1.0969	3.27562
METTL5	0.00894143	2.18815	1.21651	3.93584
MFSD6	0.0409194	0.550072	0.310137	0.975631
MIA	0.0199111	0.520901	0.300809	0.902027
MICAL1	0.00958334	0.481815	0.2773	0.837165
MICB	0.0473496	0.579644	0.338137	0.993642
MICD	0.0103068	0.481975	0.275964	0.841777
MINPP1	0.0101301	1.9798	1.17633	3.33207
MIS18BP1	0.00717967	0.468755	0.269805	0.814407
MMP16	0.0236531	0.513738	0.288527	0.914739
MMP21	0.0212907	0.510134	0.287664	0.904652
MMP23B	0.0196916	0.521704	0.301959	0.901367
MNAT1	0.0458503	1.78827	1.01077	3.16385
MPG	0.00346	2.26233	1.30877	3.91063
MPZL1	0.00389134	0.447518	0.25926	0.772478
MRPL12	0.0289462	1.83412	1.06426	3.16089
MRPL19	0.0195019	1.9319	1.11177	3.35704
MRPL21	0.00762018	2.20481	1.23358	3.94071
MRPL40	0.0300664	1.81923	1.05942	3.12397
MRPS27	0.0412008	1.85797	1.02505	3.36768
MRPS30	0.0255742	1.94066	1.08434	3.47322
MS4A4E	0.0340963	0.538375	0.30363	0.954609
MSH2	0.0142371	2.14099	1.16482	3.93521
MSLNL	0.00702442	2.17085	1.23559	3.81404
MTA3	0.00956989	2.09004	1.19667	3.65037
MTERF3	0.0446832	1.93061	1.01574	3.66949
MTHFR	0.0484056	0.556343	0.310792	0.995901
MTIF2	0.0223797	1.90749	1.09591	3.32008
MTRF1L	0.031177	0.5324	0.300075	0.944595
MT-TF	0.000161476	2.90914	1.67045	5.06634
MTX2	0.0250907	1.98591	1.08956	3.61966
MXD4	0.0245379	0.527361	0.301916	0.921147
MYBPHL	0.0424698	0.547738	0.306215	0.979759
MYEOV	0.0291889	1.86471	1.06517	3.26442
MYO1G	0.0302648	0.549553	0.319754	0.944502
MYO5B	0.0148268	2.01342	1.14671	3.53522
MYO5C	0.00958606	2.04995	1.19089	3.52869
MYOF	0.0296056	1.85534	1.0631	3.23797
MYOZ3	0.0221813	0.520387	0.297334	0.91077
NACA2	0.047734	1.70509	1.00534	2.89187
NAGK	0.0445692	0.56303	0.321452	0.98616
NAP1L5	0.0265446	0.538901	0.312083	0.930569
NAPSB	0.012573	0.480808	0.270524	0.854549
NBPF19	0.0155142	0.502929	0.288251	0.87749
NBPF7	0.00651735	0.453104	0.256161	0.801462
NDFIP2	0.0342089	1.80123	1.04478	3.10536
NDUFA4L2	0.017874	0.507218	0.289208	0.889568
NDUFA5P6	0.0389034	1.79972	1.0304	3.14342
NDUFB7	0.0222408	1.87522	1.09387	3.21469
NDUFV3	0.030879	1.783	1.05466	3.0143
NEB	0.0371309	0.573033	0.339459	0.967324
NEBL	0.0302066	1.93201	1.06505	3.50467
NEDD8-MDP1	0.0161767	1.9214	1.12843	3.27161
NHLRC1	0.043691	0.560901	0.319801	0.983771
NHP2	0.0249612	1.91803	1.08538	3.38946
NID1	0.015896	0.501941	0.286639	0.878962
NINJ2	0.0387597	0.565991	0.329905	0.971025
NKG7	0.0224041	0.52945	0.306743	0.913852
NLRC4	0.0370636	0.561491	0.32638	0.965964
NLRP3	0.0313196	0.534446	0.302136	0.945378
NME1-NME2	0.00283863	2.33438	1.33784	4.07323
NME6	0.0256629	1.87045	1.07911	3.24208
NOG	0.0444186	1.74441	1.01398	3.00102
NOX4	0.0017042	0.387639	0.214447	0.700707
NPIPA5	0.0026113	0.437214	0.255118	0.749283
NPIPB7	0.00500034	2.30851	1.28718	4.14024
NPM1P47	0.044817	1.78475	1.01349	3.14293
NPM1P6	0.0428815	1.76703	1.01841	3.06594
NPM3	0.00772953	2.18203	1.22892	3.87437
NPR2	0.0260625	0.518925	0.29119	0.924767
NQO1	0.0343357	0.551532	0.317841	0.957042
NR2C2	0.0355955	0.562807	0.329256	0.962021
NR2C2AP	0.0128426	2.01439	1.16027	3.49727
NT5DC2	0.0313057	0.551156	0.320452	0.947949
NUCB1-AS1	0.00514793	0.456451	0.263495	0.790708
NUF2	0.0285249	1.84798	1.06663	3.2017
NUP35	0.0117877	1.97491	1.16289	3.35396
NYAP1	0.047765	0.571103	0.327962	0.9945
OCA2	0.0268103	0.5038	0.274607	0.924283
OCSTAMP	0.0289686	0.520548	0.289732	0.935243
OLFM4	0.0423445	0.572451	0.334079	0.980908
OLFML2B	0.0156774	0.493953	0.278757	0.875278
OMG	0.0350163	0.541748	0.306414	0.957824
OR3A2	0.0159256	0.499466	0.284037	0.878289
OSBPL11	0.027857	0.544864	0.317156	0.936058
OSGEPL1	0.0382471	1.81287	1.03275	3.18229
OST4	0.0492068	0.561171	0.315545	0.997995
OTOA	0.0082124	0.437039	0.236572	0.807379
OTUD6B	0.0280986	1.85507	1.06865	3.22022
OTUD6B-AS1	0.0356654	1.78793	1.0397	3.07462
PAAF1	0.0466957	1.7203	1.00796	2.93603
PABPC1P1	0.0161712	1.98845	1.13564	3.48168
PADI1	0.00530816	2.17629	1.25973	3.75973
PAIP1	0.043251	1.7492	1.01711	3.00822
PALM	0.00355737	0.417618	0.232165	0.751208
PAQR7	0.00310474	2.43217	1.34947	4.38353
PAQR8	0.015298	0.49454	0.279944	0.87364
PAQR9	0.00707466	2.09941	1.22378	3.60158
PARD3	0.0218955	1.90102	1.09757	3.29259
PARD3B	0.0177193	0.511993	0.294425	0.890337
PARD6A	0.000186337	2.90336	1.66001	5.07798
PARVG	0.035398	0.543809	0.308303	0.959214
PATL2	0.0270633	0.536364	0.308741	0.931807
PAXIP1	0.0175586	1.92638	1.12134	3.30936
PCDH15	0.00532551	0.429336	0.23688	0.778153
PCDH19	0.039914	0.558117	0.319979	0.973486
PCDHA1	0.0187178	0.504095	0.284785	0.892296
PCMTD1	0.0172694	1.91965	1.12221	3.28374
PCSK1	0.0323501	0.53265	0.29916	0.948373
PDZPH1P	0.0145554	0.516486	0.304002	0.877488
PEA15	0.0207719	0.491147	0.268815	0.897368
PEAK1	0.00903083	0.460516	0.257304	0.824221
PEX1	0.0215543	1.89367	1.09851	3.26442
PEX19	0.0473753	0.567689	0.32439	0.993464
PEX2	0.0381303	1.76048	1.03144	3.00481
PEX26	0.0180717	1.9149	1.11747	3.28138
PGAM1P7	0.0310751	0.547549	0.316695	0.946681
PHBP12	0.0440918	1.87407	1.01675	3.45429
PHF19	0.0350754	0.565362	0.332653	0.960867
PHGDH	0.0499361	1.84408	1.00017	3.40005
PHKG1	0.0207983	0.535736	0.3156	0.909423
PHLDB3	0.0399066	0.552638	0.313876	0.973023
PHOX2B	0.00985386	2.02161	1.18454	3.45021
PI4KB	0.0166456	0.520475	0.304972	0.88826
PIF1	0.0403285	1.79367	1.0261	3.13543
PIGFP1	0.0447879	0.571957	0.331413	0.987088
PIGW	0.0122058	1.97683	1.16012	3.36851
PIK3CD-AS1	0.00580377	0.458132	0.263107	0.797716
PIK3CG	0.0319784	0.539058	0.306468	0.94817
PIK3IP1	0.0116243	0.470594	0.262047	0.845108
PIM3	0.0320732	1.832	1.0532	3.18669
PIWIL4	0.0264384	1.89524	1.07768	3.333
PKDREJ	0.0229025	0.512698	0.288341	0.911625
PKMP1	0.0149228	1.98581	1.14301	3.45004
PKMP3	0.0332217	0.534249	0.30002	0.951343
PKP3	0.0391125	1.80387	1.0299	3.15946
PLA2G16	0.0204325	1.92728	1.10674	3.35619
PLA2G4C-AS1	0.00902158	0.467297	0.263993	0.827166
PLAU	0.0441068	1.75256	1.01491	3.02634
PLCD3	0.0153187	2.01632	1.14388	3.55418
PLD4	0.00101696	0.386353	0.219089	0.681313
PLEKHG4	0.0149147	0.488796	0.274692	0.869782
PLEKHO1	0.0225543	0.513423	0.289526	0.910462
PLIN2	0.00614443	0.438423	0.24307	0.790779
PLK2	0.0382543	1.75203	1.03082	2.97785
PLPP2	0.0237374	1.97529	1.09497	3.56337
PLPPR3	0.00527819	0.450502	0.257265	0.788884
PLXDC1	0.00106138	0.337205	0.175893	0.64646
PLXDC2	0.0150562	0.498774	0.284672	0.873902
PNPT1	0.0357081	1.80651	1.04029	3.13709
POC1B-GALNT4	0.0299489	1.82102	1.05993	3.12861
POLR3G	0.0245839	1.85426	1.0823	3.17682
POP5	0.0189619	1.99386	1.12033	3.54848
POPDC2	0.00370183	0.421293	0.235006	0.755247
PORCN	0.0173717	1.96026	1.1258	3.41324
POTEE	0.0147166	0.490846	0.277089	0.869503
PPEF2	0.048989	0.585922	0.344118	0.997634
PPFIA2	0.0282419	0.518458	0.288303	0.93235
PPL	0.0332821	1.85996	1.05041	3.29345
PPP1R14BP2	0.0216611	1.90712	1.09916	3.30897
PPP2CB	0.0343275	1.86931	1.04727	3.3366
PPP6C	0.0413476	0.557903	0.318467	0.977357
PRAM1	0.00381313	0.422749	0.235928	0.757507
PRDM2	0.0174358	0.499103	0.281432	0.885132
PRDM4	0.0411279	0.573951	0.336871	0.977881
PREX1	0.0379192	0.540971	0.30285	0.966316
PRF1	0.0236158	0.537063	0.313499	0.920057
PRKAB2	0.0115094	0.496987	0.288943	0.854826
PRKAG2-AS1	0.00844219	0.48152	0.279533	0.829458
PRLR	0.0387544	0.570567	0.335127	0.971415
PRMT3	0.0273049	1.85464	1.07162	3.20981
PRR34-AS1	0.0309451	1.86327	1.05871	3.27925
PRRT4	0.026993	0.530155	0.30211	0.930338
PRSS41	0.013462	0.482274	0.270469	0.859943
PRTG	0.0365681	0.52417	0.286067	0.960454
PSAT1	0.00466758	2.23767	1.28075	3.90957
PSMD11	0.0306913	1.80824	1.05667	3.09439
PSMD6	0.0050659	2.28013	1.28128	4.05766
PTCD2P2	0.00211614	3.00798	1.4903	6.07122
PTGES	0.0425722	1.77637	1.01943	3.09533
PTGES3P2	0.0350255	0.550398	0.315916	0.958918
PTGES3P3	0.0186533	1.88566	1.11161	3.19872
PTGFRN	0.0391867	0.563219	0.326376	0.971935
PTHLH	0.0448392	1.74301	1.01288	2.99945
PTK7	0.0371055	1.79128	1.03547	3.09876
PTMAP2	0.00480973	2.17294	1.26693	3.72688
PTMAP3	0.005016	2.19193	1.26696	3.79219
PTMAP5	0.0271646	1.85998	1.0725	3.22566
PTRH1	0.0213151	1.87462	1.09796	3.20067
PTS	0.0467674	1.77673	1.00825	3.13094
PUF60	0.0245852	1.88678	1.08471	3.28194
PURG	0.0313286	0.538052	0.306033	0.945976
PWP2	0.0205591	0.522248	0.301385	0.904963
PXMP4	0.0230022	1.90165	1.09266	3.30961
PYCRL	0.0377535	1.85004	1.03542	3.30554
PYGL	0.044314	1.74343	1.01424	2.9969
QRFP	0.0309581	1.84048	1.05747	3.20327
RAB33A	0.044769	0.575471	0.335467	0.987182
RAB6C	0.0492665	1.73181	1.00177	2.99387
RAD21-AS1	0.023371	1.91557	1.09211	3.35993
RALY-AS1	0.0145343	2.02624	1.15005	3.56996
RAMP2-AS1	0.0411967	0.564988	0.326578	0.977443
RANGAP1	0.0338762	1.80777	1.04613	3.12392
RASL11A	0.033513	0.55139	0.31849	0.9546
RASSF2	0.0199711	0.497436	0.276246	0.895733
RAVER2	0.035685	1.81043	1.04051	3.15004
RBM22	0.00995523	0.451668	0.24679	0.82663
RBP1	0.0389402	1.91097	1.03343	3.53366
RCAN2	0.0494321	0.572599	0.328324	0.998616
RELN	0.00652978	0.458527	0.261425	0.804237
RFT1	0.00207336	2.40707	1.37623	4.21005
RGL3	0.0337201	1.81664	1.04702	3.15198
RGS20	0.0424346	1.80116	1.02029	3.17968
RGS6	0.0406802	0.563468	0.325315	0.975963
RGS7BP	0.0311969	0.544626	0.313351	0.946598
RHOJ	0.0176697	0.479255	0.261019	0.879953
RIN3	0.0107293	0.475495	0.268615	0.841706
RIPK4	0.0124659	1.99738	1.16086	3.43671
RLF	0.00274553	0.404382	0.223594	0.731345
RMDN2-AS1	0.043079	0.563444	0.32319	0.982298
RN7SKP116	0.00905338	2.113	1.20482	3.70576
RN7SL239P	0.0221073	0.528478	0.306068	0.912506
RN7SL417P	0.0372659	0.559687	0.324161	0.966341
RN7SL477P	0.0283646	1.92072	1.07159	3.44268
RN7SL566P	0.0234151	0.535837	0.312408	0.919058
RN7SL619P	0.0368459	1.77939	1.03583	3.05674
RNA5SP290	0.0306205	0.546969	0.316526	0.945184
RNA5SP39	0.00869675	0.470242	0.267634	0.826228
RNASE4	0.0113291	0.476356	0.268327	0.845668
RNASET2	0.0458229	0.551206	0.307204	0.989008
RNF170	0.0409654	1.73886	1.02297	2.95571
RNF26	0.00269296	2.35191	1.34532	4.11164
RNU1-36P	0.0470838	1.73087	1.00709	2.97481
RNU4-62P	0.028348	0.543032	0.314607	0.937309
RNU6-564P	0.0180243	0.511084	0.293036	0.891381
RNU6-658P	0.0406128	1.74168	1.02399	2.96236
RNU6ATAC	0.0177512	1.9287	1.12055	3.3197
RNY1	0.0181141	0.514305	0.296294	0.892724
RNY1P13	0.0488085	1.74956	1.00293	3.05203
ROR1	0.0295996	0.532555	0.301876	0.939508
ROR2	0.0457629	0.551305	0.307364	0.988851
RPH3A	0.0142925	0.479518	0.26634	0.863325
RPH3AL	0.0312136	1.82099	1.05557	3.14144
RPL17	0.0114539	1.99575	1.16811	3.40979
RPL21P11	0.00929549	2.04328	1.19256	3.50086
RPL21P3	0.0197968	0.504076	0.283308	0.896878
RPL23AP25	0.0268099	0.550053	0.324059	0.933653
RPL31P7	0.0431221	1.74297	1.01733	2.98618
RPL39P18	0.0323031	0.555098	0.323829	0.951533
RPL41P5	0.0165515	2.00318	1.13491	3.53573
RPL5P24	0.0156228	2.05451	1.14603	3.68317
RPL7AP50	0.0484323	0.564454	0.319866	0.996069
RPL7P15	0.0286403	1.84284	1.06589	3.1861
RPS11P7	0.0496221	1.69607	1.00087	2.87415
RPS12P23	0.0353604	1.79859	1.04106	3.10733
RPS12P31	0.0067335	2.08579	1.22558	3.54976
RPS15AP17	0.042978	0.580854	0.343233	0.982979
RPS17P1	0.0395222	0.55485	0.31668	0.972142
RPS20P2	0.0203138	0.521112	0.300499	0.90369
RPS27AP2	0.0164542	1.98956	1.13408	3.49038
RPS27AP6	0.00408875	2.23837	1.2914	3.87975
RPS29P16	0.0130647	0.511264	0.301003	0.868399
RPS2P28	0.0208318	1.9324	1.10525	3.37857
RPS2P5	0.0367425	0.559783	0.324759	0.964893
RPS3AP46	0.0434786	1.74873	1.0165	3.00844
RPS4XP6	0.00403089	2.16964	1.27974	3.67837
RPS6KA2-IT1	0.0291269	0.550157	0.321629	0.94106
RPSAP5	0.0396674	0.570684	0.33443	0.973837
RPSAP54	0.00140579	2.50661	1.4261	4.40578
RPSAP61	0.00932105	2.04302	1.19229	3.50074
RRAS	0.0369991	1.782	1.03546	3.06676
RRAS2	0.00810599	2.11795	1.2152	3.69132
RRNAD1	0.0235775	1.88612	1.08893	3.26691
RRP7A	0.0471505	1.72996	1.00692	2.97219
RSAD1	0.029927	1.8138	1.0596	3.10483
RSPH10B	0.012553	1.95399	1.15477	3.30633
RSU1P2	0.00509483	0.442886	0.250488	0.783063
RTTN	0.0261459	1.83291	1.07459	3.12636
RUNDC3A-AS1	0.0317181	1.82828	1.05422	3.17068
RWDD4P2	0.0214268	1.91963	1.10131	3.34598
SALL1	0.0291293	1.83557	1.06368	3.16761
SAMD3	0.0234996	0.516623	0.291742	0.914847
SART3	0.0404739	0.566336	0.328749	0.975628
SCAMP1	0.0499065	1.74958	1.00023	3.06033
SCEL	0.0434914	1.79669	1.01727	3.17329
SCGB1D2	0.00225127	2.37704	1.36389	4.1428
SCO2	0.0437051	1.72551	1.01552	2.9319
SCRIB	0.0263325	1.91244	1.07926	3.38883
SCUBE3	0.0317778	0.546399	0.314708	0.948662
SDHAF3	0.0442456	1.75311	1.01456	3.0293
SEC11A	0.0222424	1.8575	1.09239	3.1585
SEC14L1	0.0232245	0.511573	0.286775	0.912586
SELENOW	0.038693	0.561211	0.324559	0.970418
SELPLG	0.0290097	0.52414	0.293494	0.936042
SEMA4D	0.0371171	0.563149	0.328203	0.966283
SEMA5A	0.0309834	0.525604	0.293	0.942864
SEMA5B	0.0291008	0.542335	0.313032	0.939608
SENP3-EIF4A1	0.0388539	0.563521	0.32702	0.971061
SENP6	0.00843971	0.468931	0.266917	0.823838
SENP8	0.0342849	1.76732	1.04307	2.99444
SERPINA12	0.0270839	0.542101	0.314977	0.933
SERPINB9	0.0325399	0.550921	0.318939	0.951638
SETP9	0.0132979	0.480573	0.269038	0.858431
SETX	0.029673	0.534854	0.30428	0.940147
SFRP1	0.0251017	0.519669	0.293072	0.921467
SFTPD	0.0463722	1.76922	1.00921	3.10155
SFXN2	0.034458	1.76497	1.04244	2.98831
SFXN4	0.0293923	1.82987	1.06241	3.15175
SH2B3	0.0200035	0.511881	0.291162	0.899918
SH2D2A	0.0355174	0.556137	0.321831	0.961026
SH2D3A	0.041683	1.80954	1.02259	3.20211
SH3BP5	0.0472551	0.556567	0.311974	0.992924
SH3PXD2A	0.00595227	0.434294	0.239698	0.78687
SHROOM2	0.0324031	1.85527	1.0532	3.26816
SIGLEC14	0.0350621	0.535972	0.300098	0.957242
SIGLEC8	0.0373804	0.5538	0.317469	0.966062
SIK1	0.0306302	1.79119	1.05594	3.0384
SIM2	0.0435088	1.72649	1.01604	2.93371
SLA	0.0388694	0.55331	0.315557	0.970195
SLA2	0.0148766	0.505395	0.291821	0.875279
SLC10A4	0.0270275	1.86316	1.07324	3.23448
SLC12A6	0.0197635	0.510237	0.28976	0.898473
SLC19A3	0.00926308	0.467678	0.263847	0.828977
SLC22A23	0.018565	0.470668	0.251322	0.881451
SLC24A4	0.00234485	0.389038	0.211778	0.714664
SLC25A10	0.0333372	1.8122	1.04807	3.13346
SLC25A17	0.0307332	1.82871	1.05763	3.16196
SLC25A22	0.0360615	1.82384	1.03984	3.19894
SLC25A3	0.0340098	0.562477	0.330422	0.957504
SLC25A32	0.028033	1.84926	1.06853	3.20042
SLC25A39	0.0281725	1.86187	1.06879	3.24346
SLC25A5-AS1	0.0130076	1.98582	1.15561	3.41244
SLC28A2	0.0228999	0.531511	0.308351	0.916177
SLC29A3	0.0333079	0.558647	0.326798	0.95498
SLC2A11	0.034374	1.82229	1.04515	3.17727
SLC2A9	0.0190586	0.513218	0.293837	0.89639
SLC31A2	0.0310933	0.554758	0.324684	0.947863
SLC35B2	0.0412244	1.7506	1.02255	2.997
SLC38A11	0.0122695	0.489114	0.279466	0.856033
SLC39A9	0.0476885	1.73439	1.00562	2.99129
SLC3A2	0.0375873	1.84868	1.0359	3.29918
SLC44A2	0.017066	1.95537	1.12701	3.39258
SLC47A1	0.0226736	0.499769	0.27523	0.907493
SLC4A11	0.0446693	1.78491	1.01389	3.14228
SLC4A7	0.0489566	0.579705	0.336897	0.997509
SLC6A15	0.0346107	1.7707	1.04222	3.00837
SLC6A6	0.0372462	0.571262	0.337318	0.967455
SLFN12L	0.00542805	0.456122	0.26228	0.793225
SLITRK5	0.0409818	0.559847	0.320969	0.976508
SMARCE1P6	0.0432208	0.565736	0.325662	0.982791
SMIM14	0.0285331	1.87995	1.06852	3.30759
SMOC2	0.0127123	0.472431	0.261925	0.852118
SNORA77	0.0314444	0.526318	0.293293	0.944487
SNRPCP3	0.0398146	1.80539	1.02789	3.171
SNTB2	0.0185531	0.498759	0.279508	0.889997
SNX29P2	0.0340881	0.539059	0.304381	0.954675
SNX30	0.0293679	0.539785	0.30996	0.940018
SOX8	0.0147639	0.499868	0.286266	0.872852
SP2-AS1	0.00565679	2.22991	1.26353	3.93539
SPAG4	0.024244	1.89409	1.08669	3.30137
SPARC	0.012313	0.487014	0.277253	0.855474
SPARCL1	0.0450569	0.537753	0.293158	0.986424
SPATA22	0.0333807	0.559883	0.328117	0.955358
SPN	0.0385017	0.542507	0.303994	0.968157
SPON1	0.0300654	0.514684	0.282428	0.937934
SPRED2	0.0407017	0.541406	0.30083	0.974373
SPRR1B	0.0350547	1.80149	1.04213	3.11418
SPRR2D	0.00770812	2.13047	1.22141	3.71611
SPRR2E	3.31178e-05	3.71219	1.99831	6.89601
SPRR3	0.0147632	1.93915	1.13869	3.30231
SPRY3	0.0452046	0.570077	0.328912	0.988067
SPTLC3	0.0266888	1.89792	1.07685	3.34501
SRPX	0.00143383	0.400721	0.228377	0.703123
SSFA2	0.0124488	2.0433	1.16669	3.57859
SSTR5	0.0472598	0.582697	0.341761	0.993488
ST13P15	0.0289996	1.81918	1.06317	3.11278
ST3GAL5-AS1	0.0196624	0.515368	0.295282	0.899491
STARD9	0.0487193	0.564951	0.320195	0.996796
STAT4	0.0216226	0.521429	0.299143	0.90889
STEAP1	0.0248966	1.9372	1.08702	3.45233
STK3	0.0252224	1.96142	1.08729	3.53831
STK38	0.0215214	0.528444	0.306773	0.910291
STK4	0.00747194	0.428699	0.230482	0.797386
STN1	0.040122	1.86898	1.02859	3.39599
STON1	0.0449141	0.54647	0.302751	0.986386
STT3B	0.0287059	1.83079	1.06492	3.14745
STX11	0.0292344	0.549749	0.321062	0.941327
SUB1P3	0.0068806	0.474273	0.276107	0.814667
SVBP	0.0342514	0.549296	0.315446	0.956506
SYCE3	0.0145423	2.09249	1.15735	3.78323
SYCP3	0.0154073	0.485946	0.27104	0.871249
SYNJ2	0.0134483	0.474756	0.262979	0.857077
SYS1-DBNDD2	0.0108844	0.480367	0.273199	0.844632
TACC1	0.0353219	0.549551	0.314694	0.959681
TAF15	0.00921806	2.00498	1.1877	3.38464
TAPT1-AS1	0.00406763	2.38187	1.31757	4.30589
TATDN1	0.00781735	2.1435	1.22216	3.75938
TBC1D16	0.0297144	0.551252	0.32222	0.94308
TBC1D24	0.0182953	1.9734	1.12201	3.47083
TBL3	0.0380007	1.80022	1.03309	3.13698
TBX21	0.0348131	0.548051	0.313526	0.958005
TBX5-AS1	0.0204406	0.50209	0.280412	0.899012
TBXAS1	0.0226082	0.536794	0.314442	0.916379
TCEA1	0.0214907	1.9084	1.10006	3.31071
TEAD4	0.0167396	1.93954	1.1272	3.33731
TECTB	0.0402287	0.552492	0.313427	0.973903
TEFM	0.0199533	1.90335	1.10691	3.27285
TEKT3	0.0305684	0.534694	0.303174	0.943014
TENM4	0.0453735	0.5466	0.302511	0.987638
TFAP2C	0.0414747	1.77851	1.0225	3.0935
TFF2	0.0270348	0.538442	0.311033	0.93212
TGFB3	0.0293139	0.523984	0.293007	0.937039
TGM1	0.0275979	1.95266	1.07661	3.54156
TGOLN2	0.0476842	0.576696	0.334452	0.994399
THAP6	0.0155585	2.00346	1.14098	3.51791
THEM4	0.0343425	0.563015	0.330704	0.958518
THEMIS2	0.0162962	0.495504	0.279406	0.878735
THUMPD3	0.0362312	1.82846	1.03947	3.21632
TIMM17B	0.0131994	2.07021	1.16439	3.68071
TIMP1	0.0215387	0.534248	0.313022	0.911822
TIMP4	0.0373907	0.544393	0.307073	0.965125
TIPARP-AS1	0.0244809	1.87745	1.08445	3.25032
TK2	0.0301823	1.87934	1.06233	3.3247
TKFC	0.0219413	1.93464	1.10015	3.4021
TLCD1	0.0265796	1.88537	1.07646	3.30214
TLE4	0.0384429	0.552465	0.315007	0.968924
TLN1	0.00323587	0.379937	0.1995	0.72357
TM6SF1	0.0374532	0.550071	0.313264	0.965888
TMED3	0.0220633	1.85192	1.09269	3.13869
TMED4	0.0484034	1.76206	1.00398	3.09254
TMED8	0.0333061	0.540899	0.307149	0.952538
TMEM101	0.0192829	1.92377	1.11212	3.32778
TMEM106B	0.0409218	1.77135	1.02387	3.06453
TMEM114	0.0205336	1.90487	1.10426	3.28595
TMEM117	0.0434745	0.559924	0.318888	0.983151
TMEM119	0.016191	0.510704	0.295325	0.88316
TMEM168	0.0492777	0.550396	0.303509	0.998114
TMEM200C	0.0323746	0.549129	0.31712	0.950882
TMEM230	0.0307115	1.84332	1.05849	3.21007
TMEM248	0.0242145	0.504797	0.278567	0.914755
TMEM249	0.042258	1.75312	1.01982	3.01368
TMEM52	0.00637007	2.20563	1.24947	3.8935
TMEM67	0.0194758	1.94517	1.11313	3.39916
TMEM86B	0.0176927	0.518835	0.301688	0.892277
TMSB4XP1	0.00720466	2.09258	1.22121	3.58572
TMUB1	0.033894	1.79875	1.04567	3.09418
TNFSF10	0.00987403	2.03308	1.18598	3.48523
TNFSF12-TNFSF13	0.0169809	0.467519	0.25043	0.872797
TNRC18P1	0.0239268	0.532802	0.3085	0.92019
TOB1	0.0204702	1.9417	1.10783	3.40324
TOE1	0.043728	0.571467	0.331755	0.984384
TPCN1	0.0280369	0.52466	0.295089	0.932833
TPI1P2	0.0246519	1.90625	1.08585	3.34649
TPK1	0.0101056	0.47577	0.270134	0.837943
TPMT	0.0179913	0.502376	0.284016	0.888615
TPP1	0.0442139	0.566172	0.325307	0.98538
TPRG1-AS2	0.0262474	1.80853	1.07251	3.04966
TPT1P12	0.022814	0.520987	0.297188	0.913319
TRAF1	0.0459453	0.55664	0.313134	0.989509
TRAF3	0.00261388	0.406893	0.226558	0.730771
TRAV10	0.0356648	0.535078	0.298561	0.958963
TRAV24	0.0423753	0.574661	0.336591	0.981117
TRAV26-1	0.0186971	0.509543	0.290482	0.893804
TRAV34	0.0116161	0.471334	0.262795	0.845356
TRAV38-1	0.0498567	0.576849	0.332869	0.999656
TRAV8-4	0.00478056	0.450297	0.258701	0.783792
TRBJ2-7	0.0304647	0.531444	0.299778	0.942139
TRBV12-4	0.0411453	0.563397	0.324823	0.977196
TRBV6-4	0.0419416	0.567755	0.329066	0.97958
TRG-AS1	0.0211515	0.526535	0.305198	0.908391
TRGC1	0.0355423	0.546406	0.311016	0.959951
TRGC2	0.0242201	0.539804	0.315764	0.922804
TRGV10	0.0478654	0.57387	0.33105	0.994794
TRIL	0.0202025	0.499552	0.278112	0.897309
TRIM5	0.0296067	1.8182	1.06097	3.11588
TRIM55	0.0124175	0.504844	0.295421	0.862726
TRMT61B	0.00090829	2.54252	1.46499	4.41258
TRPC6	0.0222547	0.512343	0.288765	0.909029
TRPM8	0.0444862	1.7811	1.01433	3.12752
TRPT1	0.033416	1.82252	1.04828	3.16861
TSG101	0.019108	2.04352	1.12405	3.71511
TSGA10	0.0470732	1.75563	1.0073	3.05988
TSKS	0.0319322	0.557563	0.326965	0.950794
TSPAN18	0.0254106	0.500226	0.272499	0.918264
TSPOAP1-AS1	0.00470447	0.426284	0.236011	0.769955
TTC27	0.00792453	2.22224	1.23257	4.00656
TTC29	0.0165669	0.481654	0.264989	0.875474
TTC9C	0.0111995	2.06738	1.17947	3.62372
TTLL2	0.010526	0.484186	0.277761	0.844022
TUB	0.00622537	0.439316	0.243694	0.79197
TUBA3D	0.0488573	0.572698	0.3289	0.997211
TUBB8P2	0.00199088	2.37787	1.37308	4.11792
TUBBP6	0.00303211	2.31866	1.32972	4.04312
TUBG1	0.0207212	1.85653	1.09904	3.1361
TYSND1	0.00344008	2.29015	1.31451	3.98994
UBA5	0.0280351	1.84084	1.068	3.17294
UBASH3A	0.0156564	0.499904	0.284901	0.877161
UBE2H	0.0325592	1.82435	1.0512	3.16616
UBE2N	0.0251176	0.535196	0.309687	0.924918
UBQLN2	0.00371683	0.426237	0.239584	0.758305
UBR7	0.0132229	2.01	1.15706	3.49169
UCP1	0.0488658	0.58199	0.339625	0.997311
UGT2B11	0.0195965	0.508962	0.288651	0.897421
UHRF1BP1L	0.040198	0.553684	0.314778	0.973912
UNC13C	0.000955208	0.371493	0.20644	0.668508
UNC50	0.00118995	2.68476	1.47758	4.87822
UPK2	0.0329874	1.83047	1.05006	3.19088
UPK3B	0.00704166	2.20567	1.24075	3.92098
USE1	0.021891	1.86184	1.09429	3.16776
USP24	0.0178218	0.51746	0.300044	0.892416
USP40	0.00826167	2.26879	1.23529	4.16698
UTS2	0.029103	0.542412	0.313113	0.939628
UXT-AS1	0.044255	1.77306	1.01483	3.0978
VASH1	0.0105073	0.46374	0.257418	0.835432
VCAN	0.0209864	0.51105	0.28901	0.903677
VEGFD	0.0120654	0.476837	0.26745	0.850151
VIM	0.0448025	0.567059	0.325815	0.986928
VN1R48P	0.0200756	0.51375	0.293029	0.900729
VN1R84P	0.00316037	2.2644	1.31601	3.89624
VPS4B	0.0254025	1.8367	1.07774	3.13011
VSTM4	0.0162685	0.498136	0.282148	0.879463
WBSCR27	0.0189126	1.95224	1.1167	3.41295
WDR74	0.0348512	1.86232	1.04523	3.31816
WDR81	0.0221067	0.512666	0.289286	0.908533
WIZ	0.0260187	1.87672	1.07812	3.26688
WNT10B	0.00822794	0.453926	0.252683	0.815446
WNT9B	0.010364	0.4861	0.280028	0.84382
XAF1	0.048242	1.73792	1.00428	3.00748
XCR1	0.0460948	0.556742	0.313123	0.989903
ZBED2	0.0391301	1.78242	1.02924	3.08676
ZBTB24	0.0323388	0.554609	0.323246	0.951569
ZCCHC24	0.0130635	0.489876	0.278843	0.860623
ZFHX4	0.0141015	0.487431	0.274614	0.865173
ZFHX4-AS1	0.0457033	0.570403	0.328867	0.989336
ZFP91	0.022236	1.96101	1.1009	3.4931
ZFP92	0.0315448	0.530715	0.297891	0.945508
ZKSCAN8	0.0450505	0.56793	0.326596	0.987595
ZNF184	0.0255931	0.508728	0.28105	0.920849
ZNF192P1	0.0328502	1.82286	1.05016	3.1641
ZNF222	0.0297408	0.54941	0.320147	0.942851
ZNF230	0.0343467	0.564557	0.332447	0.958723
ZNF257	0.0155678	0.47999	0.264815	0.870003
ZNF280A	0.0449495	1.75335	1.01273	3.0356
ZNF286A	0.0354103	0.542139	0.306465	0.959049
ZNF334	0.0485602	1.76707	1.00361	3.11132
ZNF341	0.0202863	1.95607	1.11001	3.44701
ZNF341-AS1	0.00737551	2.17848	1.23253	3.85046
ZNF354C	0.0114563	0.468816	0.260601	0.843389
ZNF365	0.0151422	1.97553	1.14049	3.42196
ZNF385D	0.0191574	0.525612	0.306862	0.900303
ZNF444P1	0.0366237	1.81667	1.03782	3.18001
ZNF490	0.0263233	0.531495	0.304303	0.92831
ZNF518B	0.013175	0.484581	0.27328	0.859258
ZNF551	0.0215014	0.534006	0.312808	0.911622
ZNF558	0.0234511	1.88112	1.08909	3.24916
ZNF587	0.0159133	0.517902	0.303349	0.884205
ZNF701	0.0474019	0.585965	0.345465	0.993892
ZNF706	0.0223493	1.88369	1.0941	3.24312
ZNF75D	0.0229964	0.531363	0.308073	0.916494
ZNF840P	0.0228764	1.89666	1.09282	3.29177
ZNHIT3	0.0108082	2.12734	1.19054	3.8013
ZSCAN20	0.0108616	0.484681	0.2776	0.846237
ZSCAN21	0.0234497	1.94817	1.09426	3.46845
ZZEF1	0.0214051	0.521121	0.299092	0.907971

## Sheet: Supplementary Table S2
datSummary	colorNEW	kMEblue	kMEbrown	kMEgrey	kMEturquoise
AATF	grey	-0.371483	0.204747	0.637184	-0.339366
AATK-AS1	grey	-0.122975	0.0313343	0.00804515	-0.0274022
ABCA13	grey	0.0248394	-0.0775546	0.0825817	-0.137921
ACACB	grey	0.0658275	0.33642	-0.474827	0.310892
ACBD7	grey	-0.000935474	-0.160095	0.161896	-0.232504
ACHE	grey	-0.239299	-0.12052	0.143305	-0.0915117
ACSM1	grey	-0.225202	0.150379	0.172567	-0.164141
ACTG1P9	grey	0.0560314	-0.059675	-0.000917019	0.034244
ACTN3	grey	0.304905	-0.144648	-0.479274	0.369481
ACTR3B	grey	-0.256803	0.415979	0.137557	-0.0976725
ACTR3C	grey	-0.358247	0.443029	0.240465	-0.271883
ADAM17	grey	0.330895	-0.309011	-0.233112	0.0115268
ADAM29	grey	0.134358	-0.151241	-0.485602	0.621786
ADAMTS7P1	grey	0.0566148	-0.064919	-0.0684248	0.248286
ADAMTS8	grey	0.24554	-0.056415	-0.419327	0.247354
ADGRA2	blue	0.820958	-0.255198	-0.818015	0.502773
ADGRA3	grey	-0.107846	0.00755918	0.212812	-0.421554
ADGRD1	grey	0.576531	-0.115327	-0.761548	0.428355
ADGRE1	grey	0.332436	-0.114123	-0.500747	0.46939
ADH1B	grey	0.319781	-0.0200738	-0.67126	0.547572
ADPGK-AS1	grey	0.343086	-0.0306251	-0.511276	0.602562
ADRA1D	grey	0.108399	0.299251	-0.166854	0.0865942
ADRB1	grey	-0.181911	0.0535599	0.0714264	-0.0548428
AGBL5-IT1	grey	-0.290945	0.0557281	0.110068	0.0427824
AGPAT1	grey	0.217075	0.0656051	0.0368545	-0.121348
AGPAT4-IT1	grey	0.117559	-0.0941937	-0.166071	0.138411
AGTR1	grey	0.355832	-0.066478	-0.568467	0.420679
AHNAK2	grey	0.0277677	-0.175604	0.368159	-0.415835
AIRE	turquoise	0.00830626	-0.0994226	-0.225127	0.712691
AK4P3	grey	-0.0120465	-0.0720621	0.0640206	-0.0359736
AKR1C1	grey	-0.0331586	-0.0234751	-0.126689	0.13572
AMD1P3	grey	0.0419446	-0.22659	-0.0786139	-0.0626096
AMIGO2	grey	-0.0558034	-0.124459	0.286576	-0.235119
AMPD2	grey	0.249611	-0.203345	-0.300637	0.226701
AMY1A	grey	0.03675	0.179368	-0.0980278	0.062092
ANK2	grey	0.436084	-0.153381	-0.755165	0.666932
ANKEF1	grey	-0.182177	0.457978	0.128074	-0.22671
ANKRD18B	grey	0.040833	-0.0112491	0.15423	-0.216397
ANKRD2	grey	-0.00526878	0.278995	0.207904	-0.00927912
ANKRD22	grey	-0.323577	0.0193162	0.445401	-0.330393
ANLN	grey	-0.1626	-0.127687	0.416343	-0.366198
ANTXRLP1	turquoise	0.267869	-0.155264	-0.604858	0.917362
ANXA2P1	grey	-0.155888	-0.167895	0.444189	-0.401961
ANXA2P2	grey	-0.145086	-0.251443	0.418455	-0.424638
ANXA2P3	grey	-0.0818869	-0.17658	0.276327	-0.243862
AOAH	turquoise	0.395066	-0.100792	-0.717012	0.693591
AP1S3	grey	-0.14678	-0.187025	0.365049	-0.378138
AP4B1	grey	-0.367738	-0.00999923	0.368369	-0.184894
APEH	grey	-0.486614	0.326803	0.630709	-0.396813
APITD1-CORT	grey	-0.263992	0.224191	0.315964	-0.173163
APOB	grey	-0.00133125	-0.0392105	-0.0418219	0.0115242
APOC1	grey	0.231303	-0.0781287	-0.198908	0.259248
ARAP3	grey	-0.202202	-0.116112	0.189537	-0.207911
ARFGAP3	grey	0.126379	0.129659	0.0590033	-0.230569
ARGFXP2	grey	-0.0663933	-0.0546005	-0.0907024	0.0619603
ARHGAP11B	grey	-0.284902	-0.179182	0.389205	-0.258191
ARHGAP12	grey	-0.214641	-0.136433	0.281442	-0.426085
ARHGAP15	turquoise	0.291314	-0.142812	-0.629601	0.951345
ARHGAP30	turquoise	0.326889	-0.205043	-0.675264	0.962274
ARHGEF10L	grey	-0.330291	0.405294	0.257426	-0.336461
ARHGEF2	grey	-0.155798	-0.176134	0.217423	-0.187416
ARHGEF28	grey	-0.324331	0.172305	0.352941	-0.406041
ARID5A	turquoise	0.1551	-0.0440194	-0.278288	0.703053
ARIH2P1	grey	0.0894693	-0.0782591	-0.149545	0.0459632
ARMC10P1	grey	-0.110456	-0.0212637	0.215563	-0.187131
ARMC4P1	grey	-0.00515285	0.128306	0.052915	-0.114588
ARNTL2	grey	-0.105659	-0.15313	0.388938	-0.341563
ARPC5	grey	-0.0373028	-0.160239	0.263644	-0.11965
ARSD	grey	-0.313714	0.165787	0.316103	-0.39432
ARV1	grey	-0.357054	0.192982	0.406813	-0.294771
AS3MT	grey	-0.054663	0.432956	-0.0084531	-0.0872605
ASF1B	grey	-0.356738	-0.128732	0.60044	-0.342073
ASH2L	grey	0.0737884	0.397278	0.0242088	-0.00847485
ATF4P4	grey	-0.157346	0.28274	0.189981	0.088462
ATIC	grey	-0.322005	0.0676469	0.554344	-0.333244
ATL2	grey	-0.0660329	-0.171671	0.170015	-0.228793
ATL3	grey	0.431558	-0.217723	-0.131604	-0.125111
ATOH7	grey	-0.331941	0.325643	0.234146	-0.187856
ATP6V0D2	grey	0.256391	-0.183266	-0.230726	0.267674
ATP6V1B1	grey	-0.283221	0.0137694	0.384822	-0.248106
ATXN1	blue	0.845013	-0.305861	-0.615345	0.22771
ATXN7L2	grey	-0.104119	-0.0571236	-0.12467	0.349026
AVEN	grey	0.18033	0.328015	0.27797	-0.14776
AZIN1	grey	0.194496	-0.0186639	0.102445	-0.261632
AZIN1-AS1	brown	-0.275491	0.83458	0.268654	-0.166867
AZIN2	grey	0.558954	-0.217708	-0.337363	0.271197
BAG6	grey	-0.154889	0.0899098	0.301619	-0.216457
BAIAP3	grey	-0.0871549	0.0654542	-0.00349167	-0.0366586
BATF2	grey	-0.204719	-0.000493949	0.291821	-0.161342
BCCIP	grey	-0.445485	0.410156	0.598113	-0.333295
BCDIN3D-AS1	grey	0.0254785	0.0153778	-0.377313	0.239054
BEX2	grey	-0.169296	0.445758	-0.0322625	0.0921843
BGN	grey	0.730697	-0.239834	-0.389282	0.237132
BLNK	grey	-0.357896	0.0226741	0.12809	0.0234371
BMP7	grey	0.0504337	-0.0596813	-0.00293053	0.00461428
BMP8A	grey	0.523455	-0.0841353	-0.425109	0.141329
BNIP3	brown	-0.162793	0.902862	0.127477	-0.111281
BOC	grey	0.768481	-0.205378	-0.810188	0.45369
BPGM	grey	0.116618	-0.175422	0.0383447	-0.0266293
BPI	grey	-0.0278274	-0.0615645	0.070173	-0.0499196
BRCC3	grey	-0.106955	-0.0893886	0.225297	-0.315471
BRD7P4	grey	0.121205	-0.149012	-0.205247	0.161727
BRD8	grey	-0.234741	0.0768159	0.124584	-0.183129
BRD9P2	grey	-0.0350565	0.197412	-0.0950776	-0.0549603
BSPRY	grey	-0.43335	0.590988	0.470129	-0.419421
BTBD9	grey	0.28289	-0.00165006	-0.403442	0.166891
BTN3A1	grey	0.351307	-0.286059	-0.473751	0.5489
BUD13P1	grey	-0.21426	-0.07976	0.246487	-0.269485
C10orf105	turquoise	0.174121	-0.17739	-0.501947	0.706519
C10orf71	brown	-0.154632	0.689158	0.116334	-0.159177
C11orf52	grey	-0.131631	0.121101	0.0921144	-0.219031
C11orf58	grey	0.263261	-0.154077	-0.19666	0.0291517
C11orf97	grey	0.0360733	0.0173492	0.0315472	-0.0719436
C11orf98	grey	-0.337549	0.0877271	0.568705	-0.234775
C12orf77	grey	0.12282	-0.148051	-0.262206	0.403149
C15orf56	grey	-0.346258	0.691278	0.301693	-0.255283
C17orf75	grey	-0.309027	0.413019	0.234794	-0.194204
C17orf80	grey	0.217853	0.0666642	-0.426217	0.1952
C19orf33	grey	-0.40076	-0.0483767	0.635758	-0.399767
C19orf44	grey	-0.0988934	0.247687	0.126481	-0.224324
C19orf70	grey	-0.345074	0.432683	0.602608	-0.257597
C19orf84	grey	0.00822696	-0.128842	-0.028198	0.193316
C1orf100	grey	-0.251179	0.0700501	0.159479	0.0649349
C1orf146	grey	-0.145963	0.113815	0.0985361	0.0646194
C1orf167	grey	0.0489559	-0.0933154	-0.199342	0.269223
C1orf53	grey	-0.464499	0.196622	0.608723	-0.34505
C1orf56	grey	-0.493603	0.681416	0.466011	-0.32057
C1orf61	grey	-0.0172839	-0.0383943	0.0890053	0.043928
C1orf64	grey	-0.015261	-0.0122522	0.0321462	-0.0733116
C2CD4B	brown	-0.304002	0.918443	0.249432	-0.16626
C3orf70	grey	0.201385	-0.102638	-0.246081	0.0695511
C5orf38	grey	0.0544271	0.0511017	-0.255459	0.120555
C6orf106	grey	0.107058	-0.0122103	0.047037	-0.0708381
C8B	grey	-0.159647	0.0329378	0.0905093	-0.0677535
C8orf59	grey	-0.302926	0.274766	0.556889	-0.247489
C8orf89	grey	0.301496	0.031384	-0.265033	0.440936
CA12	grey	-0.148299	0.0355499	0.267794	-0.287243
CA3	grey	-0.0295821	-0.11257	-0.218969	0.168163
CALM3	grey	-0.0977961	0.0985557	0.185622	-0.0649542
CALML6	grey	-0.335564	0.58909	0.383375	-0.185857
CAMK2N2	brown	-0.211359	0.942387	0.21311	-0.124521
CAPN1	grey	-0.387557	0.0096522	0.666056	-0.512848
CARD17	turquoise	0.204769	-0.229827	-0.393112	0.727226
CARD6	grey	0.110699	-0.290006	-0.171804	-0.0588804
CARMIL3	grey	-0.32343	0.00712578	0.0316521	0.0249809
CARMN	grey	0.31434	-0.147615	-0.29521	0.084297
CASC8	grey	-0.343689	0.0373104	0.543637	-0.381247
CASP1P2	turquoise	0.229174	-0.181022	-0.447148	0.767741
CATSPERG	grey	-0.220388	0.0582489	0.298964	-0.180296
CBFA2T2	grey	-0.144819	-0.0711023	0.0744206	-0.0636532
CBR4	grey	-0.240323	0.11038	-0.0598645	-0.00102069
CBWD2	grey	-0.403067	0.0580973	0.583854	-0.550482
CBX6	grey	0.302754	0.0703002	-0.555008	0.423145
CCDC42	turquoise	0.242326	-0.126375	-0.440099	0.774851
CCDC78	grey	-0.25666	-0.052266	0.350354	-0.197544
CCDC86	grey	-0.124327	0.270849	0.281462	-0.14438
CCDC91	grey	0.0577841	0.0240187	0.0310573	-0.157784
CCDC92	grey	0.213572	-0.00224497	-0.123838	0.183843
CCDC94	grey	-0.381252	0.523669	0.41452	-0.0272654
CCL5	turquoise	0.22976	-0.125831	-0.539626	0.77447
CCNB1	grey	-0.319724	-0.0812482	0.566917	-0.375882
CCNB2	grey	-0.269191	-0.11211	0.55614	-0.319028
CCR5	turquoise	0.365082	-0.160873	-0.719281	0.765867
CCR6	turquoise	0.272119	-0.190265	-0.573579	0.820275
CCR9	grey	-0.0300389	-0.190927	-0.0778993	0.237162
CCT8	grey	-0.161467	0.144786	0.360034	-0.249562
CCT8P1	grey	-0.326494	0.155216	0.135416	-0.165393
CD1E	turquoise	0.220098	-0.166238	-0.559424	0.685406
CD200R1	turquoise	0.328205	-0.22024	-0.711108	0.744123
CD226	turquoise	0.372408	-0.203703	-0.762008	0.842645
CD247	turquoise	0.177163	-0.151899	-0.514206	0.942719
CD3G	turquoise	0.265528	-0.177728	-0.648087	0.933513
CD68	grey	0.271505	-0.148215	-0.23569	0.20146
CD8A	turquoise	0.322414	-0.138121	-0.682586	0.823195
CD96	turquoise	0.287001	-0.198978	-0.677222	0.954917
CD99L2	grey	0.578123	-0.00355106	-0.728901	0.516936
CDC6	grey	-0.168315	-0.103814	0.449615	-0.306429
CDCA7	grey	-0.250487	-0.145871	0.262464	-0.196009
CDH11	blue	0.911937	-0.295919	-0.450088	0.152708
CDHR1	grey	0.0180772	-0.0259872	-0.35386	0.49251
CDKAL1	grey	0.122543	-0.031063	-0.107886	0.0708161
CEACAM18	grey	0.140773	-0.111018	0.0552276	-0.136035
CEACAM21	turquoise	0.283645	-0.179886	-0.586206	0.885131
CEBPA	grey	0.0412605	0.0953901	-0.196602	0.203978
CECR1	grey	0.377937	-0.149389	-0.728677	0.725964
CELSR1	grey	-0.129609	-0.19162	0.381755	-0.298723
CELSR3	grey	-0.182651	-0.0689448	0.237041	-0.232045
CELSR3-AS1	grey	-0.310402	-0.0696137	0.386156	-0.265807
CENPCP1	grey	0.0085062	-0.141592	0.0216437	-0.0678151
CENPX	grey	-0.390619	0.25768	0.653326	-0.37213
CEP55	grey	-0.262506	-0.132156	0.546885	-0.386411
CEP57L1	grey	0.255059	-0.103025	-0.251665	0.092567
CERKL	turquoise	0.372212	-0.192959	-0.69238	0.875441
CES1P1	grey	-0.0693311	-0.0591706	-0.0367859	0.00561736
CFAP53	grey	-0.0564304	0.274805	0.0807069	-0.114036
CFAP58-AS1	grey	0.357403	-0.207025	-0.209742	0.205704
CHCHD5	grey	-0.376973	0.58957	0.62141	-0.293851
CHD1L	grey	-0.167157	-0.0626544	0.129342	-0.110599
CHD3	grey	0.123807	0.0501842	-0.248823	0.193871
CHMP3	grey	0.158615	-0.0809757	0.0568742	-0.316945
CHRNA1	grey	0.410659	-0.175805	-0.403983	0.322517
CHRNA3	grey	0.164708	-0.0840226	-0.252804	0.0887114
CHRNB4	grey	0.110029	-0.130648	-0.0842331	0.0301978
CKM	grey	-0.0589643	-0.0460401	0.171223	-0.0136295
CLDN11	grey	0.556602	-0.228645	-0.499204	0.403811
CLDN19	grey	0.0501479	-0.108793	-0.226922	0.297766
CLIC6	grey	0.0920507	-0.0765001	-0.191683	0.0740201
CLIP1	grey	0.288847	-0.189796	-0.257088	-0.0246187
CLN6	grey	-0.277243	0.16739	0.556838	-0.297601
CLNK	turquoise	0.19588	-0.196522	-0.563327	0.872891
CLSTN3	grey	0.0655164	-0.166765	-0.321694	0.442949
CLVS2	grey	0.165609	-0.0875327	-0.359828	0.12516
CMA1	grey	0.120934	0.060166	-0.265616	0.33093
CMTM8	grey	-0.381332	0.45957	0.3633	-0.314194
CNPPD1	grey	-0.206609	0.127183	0.32541	-0.13902
CNTNAP3	grey	-0.087424	-0.0802176	0.155718	-0.166946
CNTNAP4	grey	0.431533	-0.147491	-0.582182	0.422766
COA5	grey	-0.441519	0.155706	0.55337	-0.251027
COL4A2	grey	0.687385	-0.240281	-0.446524	0.153216
COPS5	grey	-0.426644	0.066254	0.678518	-0.429687
COQ2	grey	-0.0982921	0.0710623	0.268971	-0.126937
COQ6	grey	-0.433695	0.0706085	0.456998	-0.131649
COX10	grey	-0.0863195	0.254926	-0.00263904	-0.0226778
COX4I2	grey	0.119719	0.184536	-0.0987508	0.339727
COX5BP6	grey	-0.17527	0.0123755	0.232402	-0.190454
CPSF7	grey	-0.243082	0.00588111	0.108186	-0.0850169
CREB3L3	grey	-0.0592767	-0.0579597	0.0218524	-0.0478505
CRYBA4	grey	0.0177877	0.0360477	-0.0192877	0.107519
CSAG3	grey	-0.131818	0.021349	0.138231	-0.0686128
CSDC2	brown	-0.0529156	0.821716	0.10993	-0.0731174
CSF1	grey	0.301745	-0.0881994	-0.484973	0.361602
CSK	grey	-0.101194	-0.118635	0.00560539	0.550794
CST2	grey	0.315181	-0.13449	-0.134867	0.0690468
CST3	grey	-0.212323	0.348575	0.263968	-0.0613942
CST7	turquoise	0.305027	-0.140573	-0.556189	0.863351
CSTA	grey	-0.0559237	-0.0505323	0.17517	0.0632908
CT62	grey	-0.219819	0.0793889	0.306887	-0.258442
CTBP2P4	grey	-0.120753	0.215022	0.0983729	-0.168609
CTBP2P7	grey	-0.0612378	-0.0187401	0.171087	-0.173019
CTH	grey	-0.14886	0.605279	0.13153	-0.187226
CUL9	grey	-0.180235	0.107505	-0.0377267	0.265698
CWH43	grey	-0.107947	-0.0491093	0.138097	-0.0806687
CXADR	grey	-0.105279	-0.00898064	0.236208	-0.411843
CXCL16	grey	0.0532095	-0.185721	0.0262741	-0.0605416
CXCR4	turquoise	0.227104	-0.171991	-0.454065	0.864636
CXCR6	turquoise	0.32868	-0.153732	-0.685083	0.759777
CXorf65	grey	-0.0984741	-0.0959101	-0.0915057	0.531886
CYB5A	grey	-0.207458	0.648126	0.0750496	-0.0621617
CYCSP45	grey	0.0164613	-0.114716	0.0834374	-0.0800962
CYGB	grey	0.46973	-0.0818312	-0.450407	0.418414
CYMP	grey	-0.242069	0.0402105	0.282362	-0.184756
CYP26C1	grey	0.402079	-0.195097	-0.422224	0.383692
CYP2B7P	grey	-0.149745	-0.0794045	0.183038	-0.147222
CYSRT1	grey	-0.344443	-0.0222112	0.517256	-0.268351
CYTH3	blue	0.833079	-0.310997	-0.605084	0.267056
DAND5	grey	-0.326175	0.113212	0.367147	-0.380711
DBNDD1	grey	-0.389107	0.20586	0.503796	-0.383121
DCAF12L2	grey	0.347429	-0.151377	-0.380529	0.214216
DCAKD	grey	0.107312	0.0893288	-0.0192483	-0.0486034
DCBLD2	grey	0.0365638	-0.0927719	0.138543	-0.17685
DCDC2C	grey	0.150298	-0.0917507	-0.325166	0.132641
DEFB124	grey	0.221696	-0.118662	-0.458268	0.535757
DEPDC1B	grey	-0.303021	-0.163922	0.351616	-0.283957
DEPDC4	grey	-0.310962	0.466036	0.219444	-0.222021
DGCR5	brown	-0.196533	0.874539	0.160735	-0.151377
DHRS11	grey	-0.243666	0.113672	0.212097	-0.17505
DHRS12	brown	-0.265677	0.85028	0.238898	-0.147535
DHRS4	grey	-0.457938	0.611545	0.473319	-0.17691
DHRS4L1	brown	-0.289984	0.818921	0.107707	-0.0565591
DHRSX-IT1	grey	0.0102012	0.0984055	0.000875097	0.0337395
DLC1	grey	0.682139	-0.150603	-0.770345	0.498306
DLGAP1	grey	-0.0677737	-0.0117527	-0.0593725	0.0216733
DLX3	grey	-0.165707	0.0867186	0.297213	-0.217457
DMKN	grey	-0.506569	0.34978	0.683745	-0.441025
DMRT2	grey	0.0106567	-0.0715624	-0.116415	0.0754832
DMXL1	grey	0.307911	-0.111219	-0.591427	0.288297
DNAJC19	grey	-0.391123	0.318697	0.604459	-0.324491
DNAJC5B	grey	0.344521	-0.166695	-0.497654	0.473196
DNAJC9	grey	-0.315087	-0.0953022	0.554242	-0.267305
DNAL4	grey	-0.211022	0.242318	0.543962	-0.432353
DND1P1	grey	-0.0714214	0.0899257	0.0759105	-0.0529611
DNM1P47	grey	0.193604	-0.0126712	-0.526519	0.664217
DNM3	grey	0.505071	-0.185602	-0.667318	0.392277
DOCK11	turquoise	0.669093	-0.319158	-0.87846	0.784106
DOK6	grey	0.73254	-0.270788	-0.741587	0.33405
DPEP3	turquoise	0.161455	-0.161898	-0.363287	0.649316
DPH6	grey	-0.273129	0.139862	0.443355	-0.37448
DPP9	grey	-0.208371	-0.115327	0.449294	-0.271325
DPY19L1P2	grey	-0.360686	0.289662	0.284056	-0.304493
DPY19L2P2	grey	-0.0978185	-0.151435	0.0735229	-0.0172748
DQX1	grey	-0.29155	-0.0628165	0.291234	-0.266199
DRAM2	grey	-0.01308	-0.111121	-0.00503525	0.338512
DRAP1	grey	-0.165122	0.129747	0.50621	-0.150982
DRD1	grey	0.0422862	-0.134332	-0.00642886	-0.0349828
DSG3	grey	-0.0767878	-0.0841084	0.239986	-0.21276
DTWD1	grey	0.263127	0.4613	-0.159447	-0.0198489
DUSP14	grey	0.121632	0.0017963	0.0709453	0.0371184
DUSP4	grey	-0.264989	0.0354653	0.392573	-0.365093
DYRK2	grey	0.386024	-0.354088	-0.165895	-0.0568233
DYRK3	grey	0.368811	-0.0626952	-0.365594	0.189135
DYX1C1	grey	-0.0278146	0.128452	0.245559	-0.224311
E2F3P1	grey	0.296489	-0.140015	-0.547327	0.574753
EBI3	turquoise	0.212413	-0.14593	-0.576798	0.839452
ECSIT	grey	-0.384986	0.758265	0.476869	-0.220985
EEF1B2P1	grey	0.0287374	0.197474	0.0108286	0.062954
EEF1E1	grey	-0.26531	0.329109	0.426101	-0.234775
EFCAB11	grey	-0.21408	-0.0385909	0.400704	-0.322799
EFCAB14	grey	0.230059	-0.295801	-0.275308	-0.0321337
EFCAB7	grey	0.107205	-0.114175	-0.165938	-0.0747858
EFHD1	grey	0.0322458	-0.023412	2.88354e-05	-0.00525114
EFNA5	grey	-0.0932107	-0.22144	0.303321	-0.323349
EFR3B	grey	0.402008	-0.120099	-0.668838	0.381703
EI24	grey	-0.344893	0.47257	0.602888	-0.545639
EID3	grey	0.493291	-0.0774906	-0.625781	0.604785
EIF2S2P4	grey	-0.0120353	0.000367375	0.192319	-0.184382
EIF2S3L	grey	0.202488	-0.123746	-0.00150152	-0.113552
EIF4EP1	grey	-0.0609377	-0.223853	0.0571554	0.107774
EIF5	grey	-0.0709984	0.157475	0.00842076	-0.110269
ELFN2	grey	0.00167413	-0.0694781	0.112623	-0.11999
ELMO1	grey	0.268882	0.103744	-0.66531	0.679986
ELMO2	grey	0.377678	0.0582852	-0.551425	0.368044
EN1	grey	0.190604	-0.0908996	0.0326797	0.0866043
ENG	grey	0.460738	-0.0196793	-0.589599	0.593475
ENOX1	blue	0.858798	-0.253749	-0.701313	0.469386
ENPP2	grey	0.307815	-0.164382	-0.60589	0.38713
ENPP6	grey	0.250256	-0.160787	-0.540596	0.516089
ENPP7P11	grey	-0.319982	-0.0943896	0.0757996	0.00420884
ENPP7P8	grey	-0.0705392	-0.0988426	-0.0349435	-0.0224982
EOMES	turquoise	0.332984	-0.16775	-0.652223	0.758523
EPHA1-AS1	grey	-0.0486876	-0.0587543	0.102597	-0.0165368
EPO	brown	-0.222781	0.972433	0.213462	-0.126836
EPS15	grey	0.519366	-0.372213	-0.74156	0.507607
EPSTI1	grey	0.154191	-0.238291	-0.0212326	0.126296
ERAP2	grey	0.0442225	-0.111326	-0.0901711	0.193105
ERG	grey	0.597326	-0.118677	-0.829879	0.604518
ERGIC2	grey	0.107609	0.0802549	0.134373	-0.193262
ERMN	grey	0.313951	-0.19279	-0.20479	0.374612
ESX1	grey	-0.0102626	-0.0513081	0.0652057	-0.0363838
EVL	turquoise	0.316675	-0.0732082	-0.545326	0.868661
EXOC4	grey	-0.099635	0.17164	0.30317	-0.370688
EXOC8	grey	0.281883	-0.2651	-0.346116	0.176823
EZR-AS1	grey	-0.100929	0.00973666	0.0729091	-0.000952901
F2R	grey	0.703728	-0.269313	-0.663251	0.311641
FABP5	grey	-0.0257858	0.156383	0.0913829	0.169229
FALEC	grey	-0.144567	-0.084056	0.163806	-0.128857
FAM102B	grey	0.598152	-0.376151	-0.629008	0.325652
FAM105A	grey	0.179291	-0.0895228	-0.413961	0.236557
FAM110B	grey	0.549902	-0.149443	-0.579308	0.361004
FAM111A	grey	-0.343147	-0.212283	0.29312	-0.115698
FAM111B	grey	-0.0968084	-0.201108	0.273851	-0.227927
FAM124A	grey	0.332003	-0.108235	-0.676753	0.548472
FAM13C	grey	0.452194	-0.113203	-0.800171	0.483602
FAM150A	grey	-0.258937	-0.065871	0.33607	-0.287341
FAM151A	grey	-0.194489	-0.100899	-0.00212644	0.441115
FAM157B	grey	-0.165482	0.182418	0.0694582	0.00626858
FAM159A	turquoise	0.144194	-0.113411	-0.382522	0.841561
FAM170B	grey	0.166392	-0.101824	-0.143628	0.152835
FAM172A	grey	0.435637	0.0303822	-0.607834	0.252453
FAM172BP	turquoise	0.179887	-0.16296	-0.358358	0.546323
FAM185A	grey	-0.350317	0.108013	0.461796	-0.346
FAM198A	grey	0.714303	-0.148404	-0.685786	0.45785
FAM212B	grey	0.355673	-0.0653437	-0.64985	0.448368
FAM216B	grey	0.125162	-0.0861685	-0.0961094	0.147077
FAM25A	grey	-0.176272	0.000172451	0.413916	-0.247885
FAM26F	turquoise	0.0614466	-0.0995492	-0.341754	0.588861
FAM46A	grey	0.206135	-0.177117	-0.428552	0.166264
FAM57B	grey	-0.0369777	-0.00725252	-0.147188	0.0607009
FAM60CP	grey	0.145193	-0.18463	-0.0586789	-0.0650344
FAM69C	grey	0.409131	-0.188667	-0.140792	0.0192159
FAM78A	turquoise	0.30174	-0.158533	-0.631382	0.970351
FAM83H-AS1	grey	-0.266322	-0.041123	0.517089	-0.412984
FAM89A	grey	0.148664	0.240164	-0.0495895	0.0703409
FAM95B1	grey	-0.159618	0.0375331	0.0223896	0.0369732
FARSA	grey	-0.304197	0.210566	0.525376	-0.232504
FASLG	turquoise	0.224208	-0.130515	-0.51884	0.558238
FAT3	blue	0.617096	-0.198412	-0.278473	0.00692838
FAXC	grey	0.0391257	0.0516988	-0.100185	-0.0435411
FBLIM1	grey	0.14465	-0.176675	0.0297343	-0.169488
FBN1	blue	0.934307	-0.277134	-0.646118	0.278552
FBN2	grey	0.434384	-0.226707	-0.352461	0.251242
FBXL7	blue	0.88206	-0.25528	-0.732995	0.439062
FBXO22	grey	-0.254638	0.154468	0.42948	-0.427566
FCGRT	grey	0.115865	0.112557	-0.108465	0.238152
FGD5P1	grey	0.506528	-0.237687	-0.529642	0.28203
FGF19	grey	-0.109785	-0.0526304	0.0852804	-0.048585
FGF3	grey	-0.109911	-0.00334272	0.167794	-0.0857683
FGF5	grey	0.193695	-0.0918613	-0.0915986	-0.0736092
FGF7P8	grey	0.250162	-0.129717	-0.345329	0.0990077
FGFBP1	grey	-0.128833	-0.0725014	0.248819	-0.159337
FHP1	grey	-0.184882	0.00933017	0.0833721	-0.0797826
FIGNL2	grey	0.258348	-0.0621951	-0.208897	0.221351
FILIP1L	grey	0.518765	-0.125616	-0.650997	0.406189
FKBP2	brown	-0.4584	0.81518	0.54622	-0.299126
FKBP6	grey	-0.140242	0.042672	0.233835	-0.186274
FLJ41941	grey	0.0803439	-0.12944	-0.262082	0.201919
FLJ43879	grey	-0.164292	-0.0565512	0.288134	-0.184667
FLRT1	grey	-0.0615566	0.0912985	-0.188343	0.0409949
FLRT3	grey	-0.0312264	-0.113911	0.133447	-0.235183
FLVCR1-AS1	grey	-0.123604	0.217746	0.0666038	0.0633799
FMC1	grey	-0.347357	0.627268	0.33197	-0.0780984
FMNL3	turquoise	0.734385	-0.276951	-0.780394	0.773579
FMO6P	grey	-0.0176899	-0.0916246	0.0315721	0.0779651
FNDC1	blue	0.801282	-0.220796	-0.352105	0.123236
FNDC1-IT1	grey	0.492021	-0.107251	-0.136726	0.00958143
FNDC9	grey	0.065328	-0.0554876	-0.372866	0.312441
FOXE3	grey	-0.174699	0.0128987	0.159059	-0.073054
FOXK1	grey	0.129846	-0.0917215	-0.0115278	0.0486611
FOXO3	grey	0.434469	-0.0195217	-0.552664	0.251731
FOXP4	grey	-0.278499	0.0931288	0.292795	-0.322817
FOXP4-AS1	brown	-0.337164	0.835361	0.391784	-0.271887
FRMD3	grey	0.0563071	-0.123534	-0.211632	0.0203004
FTH1P12	grey	0.0991295	0.0405568	0.0320269	0.0492087
FYN	turquoise	0.518026	-0.213842	-0.745289	0.885237
FZD6	grey	0.0872882	-0.110451	0.141083	-0.312577
FZD8	grey	0.131707	0.278911	-0.157469	0.0550468
GAB3	turquoise	0.411509	-0.153268	-0.805797	0.87
GABRB1	grey	-0.0260496	0.00814572	-0.259889	0.0609147
GALNT6	grey	-0.257415	-0.0554852	0.279298	-0.237843
GALR3	grey	-0.22914	0.550646	0.217355	-0.197227
GAPDHP63	grey	-0.123882	-0.0690675	0.348151	-0.152948
GAPDHP73	grey	-0.174843	0.00512321	0.214848	-0.150245
GAPT	turquoise	0.277892	-0.155021	-0.608537	0.897718
GAS7	blue	0.838959	-0.234677	-0.840483	0.52225
GBA3	grey	-0.0514073	-0.0533703	-0.0699907	0.0535257
GBP7	grey	-0.0899241	-0.105745	0.110804	-0.0554066
GGTA1P	turquoise	0.456176	-0.121295	-0.801384	0.715869
GHDC	grey	-0.343867	0.233723	0.470334	-0.209614
GHR	grey	0.546649	-0.12036	-0.808481	0.586354
GJB6	grey	-0.0756371	-0.0151244	0.242643	-0.106125
GJC3	brown	-0.236614	0.912352	0.233455	-0.141919
GK-AS1	grey	0.279468	-0.225345	-0.331825	0.182128
GLI1	grey	0.782722	-0.291433	-0.661035	0.364254
GLUD1P7	grey	-0.294069	0.64543	0.301462	-0.129366
GLUD1P8	grey	-0.239696	0.406766	0.204108	-0.176032
GM2A	grey	0.425768	-0.15463	-0.458792	0.468712
GMCL1P2	grey	-0.231562	0.00160591	0.272419	-0.21689
GMIP	grey	-0.173552	-0.15992	-0.0391091	0.548312
GNA15	grey	-0.176883	-0.164896	0.452009	-0.229244
GNG10	grey	0.212884	-0.172944	-0.0893475	0.0170179
GNG2	grey	0.493874	-0.185338	-0.808	0.699425
GNPTAB	grey	0.634345	-0.264315	-0.581933	0.30781
GOLGA2P11	grey	-0.136254	-0.0204508	0.0636575	-0.0123054
GOLGA7B	grey	-0.267557	0.255532	0.206476	-0.170668
GOLGA8M	grey	0.139689	0.290769	-0.357891	0.285326
GOLGA8Q	grey	0.133789	-0.18572	-0.255984	0.168924
GOT1	grey	-0.367805	0.222035	0.352168	-0.309282
GPAT2	grey	0.0535092	-0.0333042	0.0279699	0.0645231
GPAT2P1	grey	0.109799	0.0521401	-0.109658	-0.000949893
GPC2	grey	-0.0718279	-0.161293	0.133362	0.0374746
GPC3	grey	0.395705	-0.00799321	-0.649748	0.438769
GPC5	grey	-0.170113	-0.0726414	-0.0333903	-0.0229232
GPD1	grey	0.14507	-0.108296	-0.412511	0.354407
GPNMB	grey	0.704518	-0.230682	-0.635821	0.436022
GPR137B	grey	0.421227	-0.206987	-0.25914	0.117616
GPR141	grey	0.378803	-0.190143	-0.610974	0.506976
GPR143	grey	-0.146485	-0.0135427	0.224142	-0.109815
GPR18	turquoise	0.13782	-0.114504	-0.455232	0.877927
GPR4	grey	0.434947	-0.0407718	-0.457261	0.383595
GPR87	grey	-0.207474	-0.0587805	0.409285	-0.251284
GPRASP1	grey	0.390982	-0.108555	-0.720964	0.452127
GPRIN2	grey	-0.321865	0.146339	0.382439	-0.18649
GPS1	grey	-0.353074	0.456788	0.542286	-0.212093
GPSM3	turquoise	0.133624	-0.143201	-0.357252	0.814064
GPX8	blue	0.79787	-0.304783	-0.381617	0.104578
GRAP2	turquoise	0.293562	-0.101574	-0.661246	0.923927
GRB7	grey	-0.0931325	0.0135766	0.224728	-0.187993
GRHL2	grey	-0.412256	0.0396008	0.519657	-0.518747
GRK6	grey	-0.167837	-0.0745519	0.156471	0.332135
GRM7-AS1	grey	0.0194134	-0.103238	-0.0743337	0.0878192
GSN	grey	-0.0399172	-0.133133	0.0800702	-0.00103868
GTF3C3	grey	-0.0994376	-0.12046	0.223356	-0.229649
GUSBP9	grey	0.216038	-0.165748	-0.433773	0.173804
GVINP1	turquoise	0.27675	-0.174907	-0.656725	0.931662
GXYLT2	blue	0.862504	-0.215063	-0.567259	0.297374
GYPE	turquoise	0.375514	-0.11576	-0.587255	0.802717
GZMK	turquoise	0.288161	-0.161456	-0.625052	0.854051
HAGHL	grey	-0.293173	-0.0374163	0.530391	-0.265263
HAUS2	grey	0.197944	-0.197592	0.025711	-0.149703
HCLS1	turquoise	0.373003	-0.162727	-0.713092	0.956816
HCP5B	grey	-0.185466	-0.0871096	-0.098629	0.19949
HDAC1	grey	-0.395587	-0.120961	0.482598	-0.344954
HDAC1P1	grey	0.013363	-0.131073	0.105629	-0.221807
HERPUD2	grey	0.0718519	0.0218069	0.0269031	-0.0120762
HEXIM1	grey	-0.0763954	-0.0709598	0.300674	-0.189112
HEY1	grey	0.365484	-0.0426581	-0.200512	0.124043
HIST1H2BM	grey	-0.0883135	-0.00134892	0.264588	-0.214853
HIST1H4C	grey	-0.0684346	0.012051	0.0490935	-0.0540053
HIST1H4E	grey	-0.20269	-0.0388566	0.271016	-0.22169
HIST3H2BB	grey	-0.22951	-0.0691061	0.408098	-0.305261
HLCS	grey	-0.142563	0.207064	0.133552	-0.25587
HMBS	grey	-0.507762	0.506818	0.716012	-0.342804
HMCN1	blue	0.878589	-0.256859	-0.541876	0.157072
HMGB1P31	grey	-0.0724459	-0.0949212	0.129126	-0.0323069
HMGB3P22	brown	-0.219527	0.771311	0.21137	-0.0250668
HMGCS2	grey	-0.14815	-0.0856944	0.0756093	-0.113778
HMGN1P36	grey	0.0514503	-0.00865075	0.0310802	0.00733224
HMGN1P7	grey	-0.281582	-0.0451561	0.278354	-0.296657
HMX2	grey	-0.0914655	0.0122643	-0.116957	0.0348829
HNRNPA1P39	grey	-0.0172169	0.303673	0.0345163	-0.059344
HNRNPA1P41	grey	-0.0517893	0.243561	0.110656	-0.107456
HNRNPA1P6	grey	-0.0571299	0.102154	0.026332	-0.0230261
HNRNPA3P3	grey	0.0707828	-0.0568012	0.124881	-0.0694052
HOXA4	grey	0.35442	-0.204516	-0.363399	0.128169
HOXA7	grey	0.0999005	-0.106605	-0.104641	0.134581
HOXB4	grey	0.242323	-0.1789	-0.136887	0.0200337
HOXB5	grey	-0.176421	-0.130884	0.355285	-0.327355
HOXC12	grey	-0.0900127	-0.0307182	0.0778227	-0.014091
HP	grey	0.043589	0.069	-0.0246533	-0.0341034
HPR	grey	0.0836762	-0.010344	-0.108169	0.0640189
HRAT92	grey	-0.312362	0.25401	0.320741	-0.247251
HS3ST6	grey	-0.159988	0.0784107	0.219137	-0.115378
HSBP1L1	grey	-0.485237	0.260524	0.603195	-0.415706
HSD17B1	grey	-0.14223	0.161338	0.256541	-0.172414
HSD3BP4	grey	-0.0918947	0.24272	-0.116542	0.0159655
HSF2BP	grey	0.052247	-0.0957159	0.173057	-0.159718
HSP90B3P	grey	-0.00159818	-0.0944303	-0.0207875	0.0138508
HSPB8	grey	0.172597	0.0555029	-0.351787	0.246768
HTRA4	grey	0.37134	-0.145601	-0.431708	0.40592
HUS1B	grey	-0.0971983	-0.0555548	0.286379	-0.131174
ICAM3	turquoise	0.205506	-0.154115	-0.507947	0.913012
ICK	grey	0.325743	-0.257114	-0.351009	0.036056
IFNA1	grey	-0.206795	-0.048432	0.237372	-0.189814
IFNE	grey	-0.22328	-0.0219005	0.237326	-0.187512
IFNWP19	grey	-0.226409	-0.0197296	0.28335	-0.22248
IFRD2	grey	-0.590706	0.469574	0.649497	-0.452852
IFT74-AS1	grey	-0.128545	0.0847952	0.00179503	0.0881417
IGF2	grey	-0.0679795	0.135825	0.126123	-0.0680218
IGFBP5	grey	0.627182	-0.226186	-0.548107	0.215063
IGHD3-22	grey	0.0967845	-0.0654132	-0.236541	0.299897
IGHV1-14	grey	0.207965	-0.120763	-0.28064	0.277826
IGHV3-37	grey	0.118286	-0.136248	-0.285536	0.428328
IGHV3-38	grey	0.036219	-0.0476142	-0.16382	0.237915
IGHV3-42	grey	0.15869	-0.10364	-0.307666	0.367985
IGHV3-47	grey	0.189321	-0.145296	-0.420045	0.487021
IGHV3-49	grey	0.236865	-0.135927	-0.428069	0.48137
IGHV3-52	grey	0.119527	-0.0830932	-0.192494	0.175988
IGHV3-54	grey	0.113945	-0.137614	-0.381446	0.511263
IGHV3-60	grey	0.216157	-0.158378	-0.432745	0.512442
IGHV3-71	grey	0.144111	-0.144221	-0.386314	0.494404
IGHV3OR16-15	grey	0.172634	-0.177345	-0.305424	0.372828
IGHV3OR16-16	grey	0.129995	-0.118584	-0.263243	0.324975
IGHV7-27	grey	0.169271	-0.127692	-0.439641	0.569896
IGKV1D-17	grey	0.228435	-0.060933	-0.382682	0.288612
IGKV1D-27	turquoise	0.121426	-0.11542	-0.368647	0.671957
IGKV1D-35	grey	0.124488	-0.164297	-0.344366	0.483307
IGKV1D-43	grey	0.0522469	-0.0734348	-0.119498	0.145571
IGKV1OR22-5	grey	0.119517	-0.0760576	-0.203477	0.254822
IGKV2-26	grey	0.0839437	-0.100725	-0.25444	0.362647
IGKV2-29	grey	0.174084	-0.0541346	-0.190985	0.0969396
IGKV2-40	grey	0.0945583	-0.0859471	-0.30482	0.345093
IGKV2OR2-1	grey	0.127311	-0.0441124	-0.254321	0.309639
IGKV2OR22-3	grey	0.159587	-0.107673	-0.357273	0.380656
IGLC6	turquoise	0.157848	-0.131734	-0.351242	0.676802
IGLL3P	grey	0.0011759	-0.0742091	-0.345877	0.503375
IGLV1-41	grey	0.200967	-0.096877	-0.233522	0.184287
IGLV2-18	grey	0.121262	-0.0739765	-0.211266	0.184802
IGLV2-5	grey	0.177128	-0.163381	-0.382275	0.411714
IGLV3-16	grey	0.181048	-0.108109	-0.345452	0.465216
IGLV5-48	turquoise	0.114549	-0.12191	-0.296693	0.510458
IGLVI-63	grey	0.178407	-0.154878	-0.349439	0.386594
IL16	turquoise	0.386443	-0.187377	-0.618863	0.934095
IL18	grey	-0.265681	-0.106072	0.383614	-0.167526
IL31RA	grey	-0.0586495	-0.0273039	0.211381	-0.238184
IMPDH1P6	grey	0.0101525	0.0479648	-0.177567	0.245027
INIP	grey	0.263586	-0.147428	-0.458626	0.277081
INSR	grey	-0.0992724	0.540438	0.110823	-0.276972
INTS3	grey	-0.185793	-0.123559	-0.0673605	-0.0317975
IQCH	grey	-0.14642	-0.0293316	0.246275	-0.360766
IQSEC1	grey	0.263119	-0.0273423	-0.372367	0.447436
IRGM	grey	0.318834	-0.0293382	-0.570441	0.624054
ISCA2P1	grey	-0.0699115	-0.0732365	0.111952	-0.118025
ISLR2	grey	0.458894	-0.169475	-0.374422	0.23457
ITGA11	grey	0.563442	-0.205955	-0.131322	-0.0358047
ITGA7	grey	0.160258	-0.0876559	-0.383833	0.280169
ITGAD	grey	0.446156	-0.154259	-0.514308	0.589046
ITGB7	turquoise	0.132442	-0.235415	-0.381444	0.732089
ITLN1	grey	-0.160962	-0.0293006	0.100982	-0.0881139
ITSN1	grey	0.684685	-0.371994	-0.71805	0.303836
JAKMIP2	grey	0.39853	-0.0735327	-0.519569	0.302479
KARSP2	grey	0.0851771	0.190124	-0.214708	0.0842217
KAT5	grey	-0.0735462	0.10181	0.0973697	-0.132845
KCCAT333	grey	-0.0122349	-0.0889269	0.0634908	-0.107019
KCNA3	turquoise	0.339319	-0.183413	-0.764348	0.862728
KCNAB2	turquoise	0.288843	-0.190999	-0.52622	0.770932
KCNJ10	grey	-0.0178455	-0.0646164	-0.218091	0.454167
KCNJ2-AS1	grey	0.0301925	0.099779	-0.221283	0.05847
KCNMA1-AS1	grey	0.0452173	-0.078704	-0.283488	0.0731159
KCNV2	grey	-0.175403	0.00831447	0.155853	0.0285192
KCTD14	grey	-0.372664	0.374412	0.480032	-0.43876
KCTD17	grey	0.154486	-0.0818639	-0.0195911	0.19939
KCTD20	blue	0.848551	-0.306967	-0.796761	0.470733
KDM4D	grey	0.258122	0.0405925	-0.228723	0.243194
KIAA0513	grey	-0.065931	0.229261	-0.0318477	-0.0312213
KIAA0895	grey	-0.210254	0.0116041	0.180076	-0.399761
KIAA1211	grey	0.145896	-0.265969	-0.217695	-0.0503628
KIAA1549	grey	-0.082969	0.18983	0.126722	-0.305823
KIAA1683	grey	-0.112265	-0.0348703	-0.16363	0.389148
KIF21A	grey	-0.0991627	0.0490386	-0.0118741	-0.229009
KIZ	grey	-0.129137	0.423539	-0.00208288	0.0538868
KLF10	grey	0.349424	-0.0657836	-0.30679	0.0640862
KLF12	grey	0.690785	-0.2862	-0.832726	0.671357
KLF8	grey	0.469368	-0.218798	-0.67647	0.436599
KLHL6	turquoise	0.431422	-0.223083	-0.715113	0.874448
KLRB1	turquoise	0.312943	-0.163035	-0.674013	0.865804
KLRF2	grey	-0.141345	-0.0947187	0.172474	-0.0268231
KRT13	grey	-0.0833619	0.00747433	0.131028	-0.0878332
KRT17P3	grey	-0.18071	-0.0158141	0.248537	-0.0777892
KRT18P17	grey	-0.20607	-0.0110293	0.328908	-0.290179
KRT18P19	grey	-0.20124	-0.0138138	0.373264	-0.27364
KRT18P28	grey	-0.152202	0.0174215	0.36044	-0.284153
KRT19	grey	-0.411693	-0.0921433	0.690921	-0.473895
KRT86	grey	-0.241865	0.184231	0.334173	-0.237134
KRT8P20	grey	-0.162283	0.021602	0.258929	-0.117301
KRT8P26	grey	-0.129743	0.0154921	0.24748	-0.23465
KRT8P9	grey	-0.167541	-0.0970682	0.233511	-0.197257
LAMP5	blue	0.712782	-0.208942	-0.359963	0.205979
LAMP5-AS1	grey	0.340716	-0.169721	-0.208645	0.244351
LARGE2	grey	-0.235675	0.415907	0.294424	-0.0697426
LAS1L	grey	-0.450757	0.321476	0.625019	-0.258136
LCK	turquoise	0.10684	-0.164356	-0.195619	0.455203
LCP1	turquoise	0.324427	-0.162195	-0.672609	0.909574
LDHAP2	grey	-0.00276529	-0.183993	-0.0815255	0.0965286
LDHAP7	grey	-0.138622	-0.0124451	0.247491	-0.254857
LEF1	grey	0.624571	-0.314153	-0.429935	0.490288
LEF1-AS1	grey	0.40778	-0.214995	-0.0853831	0.20559
LEFTY2	grey	0.254007	-0.0276694	-0.356369	0.286086
LENG9	grey	-0.39722	0.780905	0.476778	-0.306355
LEPR	grey	0.471511	-0.167592	-0.713557	0.386735
LGALS4	grey	-0.291807	-0.122257	0.277677	-0.251319
LHFPL5	grey	-0.213067	0.627218	0.129946	-0.197971
LILRA4	turquoise	0.322583	-0.164832	-0.440154	0.675389
LILRB4	grey	0.308372	-0.137601	-0.464151	0.52008
LIN28B	grey	-0.0299994	0.0402318	0.00621495	-0.037081
LINP1	grey	-0.0682362	-0.0792034	0.198181	-0.169582
LIPE	grey	0.0241566	-0.0278015	-0.248389	0.500649
LMCD1	grey	0.694819	-0.149776	-0.434494	0.360845
LMX1A	grey	0.100612	-0.109827	-0.205965	0.137419
LOC100421166	grey	0.266484	-0.111596	-0.466682	0.265449
LPAR4	grey	0.690643	-0.271015	-0.691198	0.419508
LPIN1	grey	-0.16518	-0.138528	0.0285992	-0.0290575
LRP1	blue	0.895874	-0.329964	-0.649406	0.295952
LRRC32	blue	0.803399	-0.224207	-0.505164	0.23159
LRRC8C	grey	0.469527	-0.212791	-0.799372	0.655511
LRRK1	grey	0.438613	-0.258701	-0.517444	0.523302
LRTM1	grey	-0.0690013	0.114106	0.0501723	-0.0272606
LSM1	grey	-0.23416	0.415478	0.41158	-0.161793
LSM4	grey	-0.47866	0.163736	0.760116	-0.395713
LSP1	turquoise	0.292195	-0.149246	-0.450935	0.816333
LTBP4	grey	0.038888	-0.150097	-0.111003	0.125462
LY6D	grey	-0.100443	-0.0504483	0.276612	-0.157645
LYPLA1	grey	-0.0391525	-0.177872	0.242337	-0.287362
LYZ	grey	-0.149245	-0.0638834	-0.0219983	-0.00756864
LZTS1	grey	0.697703	-0.211013	-0.600728	0.346387
MAATS1	grey	-0.224437	0.450689	0.0865371	-0.221309
MACROD1	grey	-0.523349	0.574119	0.675786	-0.447767
MAFA-AS1	grey	-0.225069	-0.00552623	0.260994	-0.196632
MAGOHB	grey	-0.23306	0.0596569	0.451458	-0.219807
MAGT1	grey	0.10234	0.00803709	0.08708	-0.306243
MANSC4	grey	-0.055288	0.0477363	-0.282762	0.22277
MAP1A	blue	0.848268	-0.260856	-0.737171	0.302167
MAP1LC3B2	grey	0.146661	-0.193493	-0.0239436	0.0455046
MAP2K2	grey	-0.388684	0.369146	0.587105	-0.215304
MAP3K14	turquoise	-0.0103495	-0.00827914	-0.448065	0.727885
MAPKAPK2	grey	0.16597	-0.00279782	-0.113738	0.177002
MAS1L	grey	0.305732	-0.131326	-0.570824	0.397364
MCM4	grey	-0.231649	-0.0619864	0.446211	-0.293264
MCMDC2	grey	-0.153382	0.111084	0.148022	-0.14716
MDGA2	grey	0.166052	-0.117728	-0.197075	-0.0222355
MECR	grey	-0.328468	0.232333	0.595512	-0.399718
MED12	grey	0.132062	-0.198454	-0.201336	0.00205162
MEI1	turquoise	0.0794847	-0.1504	-0.377103	0.733592
MELTF	grey	-0.187389	-0.0702626	0.404582	-0.282075
METTL1	grey	-0.213724	0.406616	0.346608	-0.153526
METTL21B	grey	-0.107785	0.580057	0.198268	-0.259634
METTL26	grey	-0.422484	0.279022	0.705137	-0.377476
METTL5	grey	-0.430318	0.337228	0.703398	-0.437203
MFSD6	grey	-0.055184	-0.188866	0.0901365	-0.213056
MIA	grey	-0.143537	-0.0899156	0.174409	-0.0975711
MICAL1	grey	-0.07868	-0.191434	-0.132461	0.431644
MICB	grey	0.070383	-0.113214	0.00389302	0.0125721
MICD	grey	-0.128022	0.0203198	-0.0054225	-0.0574685
MINPP1	grey	-0.0732839	0.0562065	0.0492029	-0.155151
MIS18BP1	grey	0.234675	-0.351286	-0.439912	0.301519
MMP16	blue	0.837673	-0.233404	-0.733037	0.296686
MMP21	grey	0.394442	-0.143498	-0.51817	0.439101
MMP23B	grey	0.218325	-0.0422701	-0.0275636	0.107963
MNAT1	grey	-0.281217	-0.0546964	0.532002	-0.417882
MPG	grey	-0.293935	0.180535	0.629744	-0.352357
MPZL1	grey	0.271077	-0.221392	-0.00100693	-0.10738
MRPL12	grey	-0.462731	0.416204	0.650222	-0.261682
MRPL19	grey	-0.0518257	0.132743	0.175864	-0.311039
MRPL21	grey	-0.490437	0.374554	0.710841	-0.388762
MRPL40	grey	-0.344657	0.602114	0.519499	-0.201188
MRPS27	grey	-0.141534	0.176847	0.227471	-0.148296
MRPS30	grey	-0.319046	0.0715029	0.515414	-0.371637
MS4A4E	grey	0.28948	-0.158751	-0.612922	0.542221
MSH2	grey	-0.0989867	-0.0917088	0.219178	-0.181509
MSLNL	grey	-0.100094	-0.0412738	0.135235	-0.148252
MTA3	grey	-0.273996	0.164057	0.475963	-0.428887
MTERF3	grey	-0.205785	-0.00294542	0.371704	-0.136607
MTHFR	grey	-0.00435912	-0.0446053	-0.196995	0.226604
MTIF2	grey	-0.368444	0.271958	0.444115	-0.371515
MTRF1L	grey	0.223703	-0.0465047	-0.328713	0.215497
MT-TF	grey	-0.092236	-0.00453957	0.0157616	0.136692
MTX2	grey	-0.415761	0.0667767	0.710814	-0.484251
MXD4	grey	0.0182784	0.246174	-0.171622	0.388375
MYBPHL	grey	-0.12978	0.0553618	0.0592317	-0.0354684
MYEOV	grey	-0.384715	-0.132533	0.530685	-0.401957
MYO1G	turquoise	0.204146	-0.170338	-0.416125	0.854936
MYO5B	grey	-0.133619	-0.0910197	0.268935	-0.364705
MYO5C	grey	-0.296748	0.147876	0.363978	-0.512239
MYOF	grey	0.280175	-0.285359	0.137869	-0.256341
MYOZ3	grey	0.628518	-0.248787	-0.559455	0.261586
NACA2	grey	-0.136971	0.0796316	0.122636	0.0378409
NAGK	grey	0.272672	-0.00835952	-0.19208	0.439275
NAP1L5	grey	0.38409	-0.0415466	-0.653114	0.489775
NAPSB	turquoise	0.167061	-0.137577	-0.455365	0.873765
NBPF19	grey	0.115484	-0.0090491	-0.306223	0.232839
NBPF7	grey	-0.150696	-0.0313076	0.151834	-0.115204
NDFIP2	grey	-0.0112379	-0.117415	0.189755	-0.396605
NDUFA4L2	grey	0.102256	-0.00406266	0.0114366	-0.0202511
NDUFA5P6	grey	-0.289693	0.295283	0.216396	-0.163462
NDUFB7	grey	-0.413683	0.502305	0.630596	-0.24978
NDUFV3	grey	-0.255439	0.395543	0.257387	-0.117364
NEB	grey	0.00367862	-0.0960813	-0.0476362	-0.00909447
NEBL	grey	-0.122852	-0.0995058	0.291624	-0.386643
NEDD8-MDP1	grey	-0.142301	0.22258	0.178038	-0.152631
NHLRC1	grey	0.0325527	0.102825	0.0270634	-0.078294
NHP2	grey	-0.475327	0.455104	0.725599	-0.36781
NID1	grey	0.761515	-0.291021	-0.675567	0.296516
NINJ2	grey	0.468937	-0.230286	-0.227688	0.216716
NKG7	turquoise	0.220901	-0.0760385	-0.470919	0.738367
NLRC4	grey	0.348544	-0.140136	-0.647757	0.64941
NLRP3	turquoise	0.367395	-0.194605	-0.628107	0.77373
NME1-NME2	grey	-0.0909595	0.10191	0.368956	-0.20253
NME6	grey	-0.30449	0.173089	0.256679	-0.219059
NOG	grey	-0.0524996	-0.0897144	0.27623	-0.199278
NOX4	grey	0.686558	-0.247988	-0.268146	0.113998
NPIPA5	grey	-0.217579	0.39911	0.24671	-0.0973924
NPIPB7	grey	-0.180975	0.0854645	0.1005	-0.056572
NPM1P47	grey	0.126202	-0.0613437	-0.24034	0.162937
NPM1P6	grey	-0.0554333	-0.178642	0.0481161	0.0365337
NPM3	grey	-0.383765	0.39379	0.569444	-0.186829
NPR2	grey	0.382332	-0.265941	-0.27426	0.107675
NQO1	grey	-0.281908	-0.171198	0.486434	-0.409648
NR2C2	grey	0.205774	-0.236857	-0.504313	0.195268
NR2C2AP	grey	-0.520024	0.2059	0.757034	-0.378552
NT5DC2	grey	0.294131	-0.0174894	0.0471547	-0.0532372
NUCB1-AS1	grey	-0.190519	-0.082717	0.0813007	-0.0639948
NUF2	grey	-0.365556	-0.0935127	0.560887	-0.355501
NUP35	grey	-0.28911	0.17137	0.32518	-0.238345
NYAP1	grey	-0.114431	-0.0245117	-0.0849084	0.0741504
OCA2	grey	0.112419	-0.146128	-0.185785	0.271446
OCSTAMP	grey	-0.0498587	-0.0190564	0.00981162	0.0207414
OLFM4	grey	-0.120819	-0.0198941	0.0729172	-0.147627
OLFML2B	blue	0.882825	-0.26334	-0.5744	0.350015
OMG	grey	0.187315	-0.151322	-0.445889	0.480353
OR3A2	grey	0.126518	-0.159278	-0.3939	0.332449
OSBPL11	grey	0.541502	-0.32232	-0.676653	0.436896
OSGEPL1	grey	-0.135895	-0.000608934	0.0357093	0.101298
OST4	grey	-0.236095	0.255023	0.550666	-0.227994
OTOA	grey	0.410574	-0.132378	-0.466984	0.466262
OTUD6B	grey	-0.0630038	-0.129762	0.17483	-0.213501
OTUD6B-AS1	grey	0.0721582	-0.00328132	-0.0853273	-0.0599849
PAAF1	grey	-0.207699	0.351612	0.340044	-0.187856
PABPC1P1	grey	0.0357542	0.00321558	0.0577307	0.0462204
PADI1	grey	-0.208598	-0.0877914	0.379901	-0.264685
PAIP1	grey	0.0204877	-0.167319	0.319746	-0.358985
PALM	grey	0.5969	-0.139119	-0.489654	0.42825
PAQR7	grey	-0.0418301	0.0756551	0.199033	-0.174156
PAQR8	grey	-0.00201906	-0.155781	-0.00622849	-0.0877351
PAQR9	grey	-0.167958	0.123321	0.230074	-0.127813
PARD3	grey	-0.237015	0.31633	0.324472	-0.433987
PARD3B	grey	0.614393	-0.178837	-0.667198	0.227683
PARD6A	brown	-0.346445	0.899641	0.320198	-0.161754
PARVG	turquoise	0.259134	-0.14678	-0.50998	0.854285
PATL2	turquoise	0.0670678	-0.16159	-0.367494	0.746153
PAXIP1	grey	-0.111521	-0.141805	0.0898516	-0.185865
PCDH15	grey	0.139401	-0.0207352	-0.399194	0.262048
PCDH19	grey	0.166894	-0.0419757	-0.286036	0.190321
PCDHA1	grey	0.0731735	0.126385	-0.453784	0.269517
PCMTD1	grey	-0.0247558	0.283429	-0.0399847	-0.181045
PCSK1	grey	-0.0478477	-0.00857498	-0.181544	0.0857771
PDZPH1P	grey	-0.0016451	-0.0765751	-0.165438	0.0667585
PEA15	grey	0.517448	-0.320593	-0.322343	0.233314
PEAK1	grey	0.771459	-0.366078	-0.709101	0.29492
PEX1	grey	-0.136852	-0.0727424	0.062134	-0.129734
PEX19	grey	-0.104315	-0.0406767	0.0906099	-0.169704
PEX2	grey	-0.121237	0.0101817	0.27219	-0.240401
PEX26	grey	-0.171929	-0.0543923	0.266015	-0.295305
PGAM1P7	grey	-0.160401	-0.0840639	0.117765	-0.0103837
PHBP12	grey	-0.028818	0.0775708	0.029821	-0.118913
PHF19	grey	0.190096	-0.274393	-0.132818	0.353852
PHGDH	brown	-0.291092	0.806032	0.329714	-0.227326
PHKG1	grey	-0.0791926	-0.0471527	-0.0258343	0.030736
PHLDB3	grey	-0.255664	0.134432	0.269538	-0.0689245
PHOX2B	grey	-0.000269736	0.0606293	-0.26867	0.116866
PI4KB	grey	-0.149406	0.0541176	0.0229956	0.060988
PIF1	grey	-0.348769	-0.144266	0.481383	-0.171055
PIGFP1	grey	-0.0766825	-0.0232456	0.0102711	0.156326
PIGW	grey	0.0398612	-0.0991344	0.0869971	-0.0589814
PIK3CD-AS1	turquoise	0.144123	-0.0378915	-0.36186	0.787179
PIK3CG	grey	0.443521	-0.204181	-0.780035	0.655011
PIK3IP1	turquoise	0.194449	-0.216299	-0.303017	0.694818
PIM3	grey	-0.38828	0.00782726	0.503044	-0.279506
PIWIL4	grey	-0.370073	0.0306094	0.333662	-0.268551
PKDREJ	grey	0.208109	-0.171168	-0.142999	-0.0604005
PKMP1	grey	-0.0169814	-0.12235	0.2397	-0.211064
PKMP3	grey	0.354205	-0.106714	-0.549474	0.429833
PKP3	grey	-0.519585	0.0266085	0.758802	-0.542653
PLA2G16	grey	-0.220412	-0.0138076	0.458414	-0.325453
PLA2G4C-AS1	grey	-0.0653804	-0.0236193	0.0183923	0.309473
PLAU	grey	0.194043	-0.158387	0.226749	-0.157141
PLCD3	grey	-0.295375	-0.096093	0.535547	-0.412788
PLD4	turquoise	0.122159	-0.0718269	-0.333483	0.729307
PLEKHG4	grey	-0.164305	0.0495001	0.151581	-0.0923111
PLEKHO1	grey	0.309655	-0.130411	-0.399828	0.673278
PLIN2	grey	0.337559	-0.212197	-0.375851	0.327212
PLK2	grey	0.0489587	-0.135165	0.0256951	-0.097384
PLPP2	grey	-0.438201	0.199526	0.691452	-0.532407
PLPPR3	grey	0.114278	-0.0723378	0.0608853	-0.0332552
PLXDC1	grey	0.620683	-0.306713	-0.600469	0.429154
PLXDC2	blue	0.930418	-0.265897	-0.725871	0.348314
PNPT1	grey	-0.145898	-0.0137058	0.290608	-0.26461
POC1B-GALNT4	grey	-0.10982	-0.129079	0.13848	-0.210613
POLR3G	grey	-0.051566	-0.0547251	0.190318	-0.130954
POP5	grey	-0.470438	0.417966	0.54676	-0.176713
POPDC2	grey	0.104121	-0.0667463	-0.218256	0.153266
PORCN	grey	-0.143402	-0.0152262	0.411617	-0.216388
POTEE	grey	0.0216436	-0.142147	0.0901415	0.00291113
PPEF2	grey	0.0235645	-0.205202	-0.185957	0.231855
PPFIA2	grey	0.697109	-0.283393	-0.634433	0.232997
PPL	grey	-0.181407	-0.0945711	0.36903	-0.333855
PPP1R14BP2	grey	-0.178888	0.0310885	0.335018	-0.222016
PPP2CB	grey	0.161804	-0.175569	-0.0942747	-0.214645
PPP6C	grey	0.10959	0.192699	-0.256805	0.206139
PRAM1	grey	0.111853	-0.0270263	-0.232229	0.293753
PRDM2	grey	0.642211	-0.265105	-0.759825	0.561043
PRDM4	grey	0.317414	-0.0846922	-0.319943	0.224137
PREX1	turquoise	0.518408	-0.202977	-0.835698	0.884243
PRF1	turquoise	0.316188	-0.0875915	-0.587123	0.778184
PRKAB2	grey	0.235759	-0.0674155	-0.145664	-0.191252
PRKAG2-AS1	grey	0.041354	0.0879981	-0.156811	0.278262
PRLR	grey	0.00331984	0.429937	-0.263985	0.043065
PRMT3	grey	-0.0399996	-0.0587467	0.175149	-0.247248
PRR34-AS1	grey	-0.346558	0.408486	0.4763	-0.228187
PRRT4	grey	0.0487571	-0.0170939	-0.229944	0.416103
PRSS41	grey	-0.24654	-0.00755285	0.245965	-0.141099
PRTG	grey	0.720125	-0.31514	-0.751894	0.320258
PSAT1	grey	-0.184323	0.61945	0.14505	-0.140129
PSMD11	grey	0.0489005	-0.0888584	0.189537	-0.155199
PSMD6	brown	-0.312381	0.86958	0.2741	-0.200475
PTCD2P2	grey	-0.0659834	-0.029205	0.109889	-0.0582077
PTGES	grey	-0.0882232	-0.00823592	0.323005	-0.200335
PTGES3P2	grey	-0.00158921	-0.0223085	-0.429241	0.415222
PTGES3P3	grey	0.149089	-0.186895	-0.0451552	-0.0927052
PTGFRN	blue	0.705408	-0.2853	-0.354266	0.0445865
PTHLH	grey	0.086509	-0.0452283	0.10838	-0.0864781
PTK7	grey	0.52494	-0.150765	-0.0385835	-0.105888
PTMAP2	grey	-0.00873375	-0.101877	0.173659	-0.0636769
PTMAP3	grey	-0.402453	0.0941422	0.346282	-0.318827
PTMAP5	grey	-0.00805054	-0.118779	0.299022	-0.155736
PTRH1	grey	-0.01047	-0.0156931	0.0281197	-0.0242858
PTS	grey	-0.172151	-0.0210264	0.475948	-0.308154
PUF60	grey	-0.245147	0.202975	0.60802	-0.311826
PURG	grey	0.644592	-0.251137	-0.59211	0.41331
PWP2	grey	0.0518025	-0.0948573	-0.00297035	0.155738
PXMP4	grey	-0.280346	0.276404	0.376255	-0.295213
PYCRL	grey	-0.451379	0.352076	0.744005	-0.416084
PYGL	grey	0.148288	-0.108411	0.183905	-0.122682
QRFP	grey	-0.126095	-0.108341	0.116361	0.0901665
RAB33A	turquoise	0.263588	-0.156147	-0.395026	0.820558
RAB6C	grey	0.123393	-0.153342	-0.308514	0.262198
RAD21-AS1	grey	-0.0183273	0.017793	0.0243496	-0.106219
RALY-AS1	grey	-0.323754	0.472226	0.525576	-0.303963
RAMP2-AS1	grey	0.376662	-0.104849	-0.773176	0.589634
RANGAP1	grey	-0.337329	0.179258	0.597981	-0.315673
RASL11A	grey	0.000948954	-0.00219369	-0.250262	0.503697
RASSF2	turquoise	0.583497	-0.247155	-0.842884	0.866239
RAVER2	grey	-0.23174	-0.0749759	-0.00922718	-0.161771
RBM22	grey	-0.0434758	-0.0068697	0.12602	-0.0473244
RBP1	grey	-0.204895	0.778948	0.267233	-0.0845034
RCAN2	grey	0.427105	-0.0655969	-0.726333	0.431491
RELN	grey	0.0952202	-0.0862777	-0.401685	0.240691
RFT1	grey	-0.228557	0.370453	0.350123	-0.206459
RGL3	grey	-0.499848	0.298362	0.482141	-0.402386
RGS20	grey	-0.0616253	-0.0115027	0.166878	-0.127596
RGS6	grey	-0.113409	-0.0497091	0.126035	-0.139382
RGS7BP	grey	0.565939	-0.2326	-0.72473	0.325315
RHOJ	grey	0.518041	-0.0897036	-0.760485	0.544497
RIN3	grey	0.3687	-0.266726	-0.414324	0.549913
RIPK4	grey	-0.343873	0.0360676	0.490403	-0.420728
RLF	grey	0.341212	-0.360894	-0.245717	0.0211558
RMDN2-AS1	grey	0.161895	-0.0220812	-0.133376	0.214474
RN7SKP116	grey	-0.0258645	-0.174208	0.196131	-0.197426
RN7SL239P	grey	-0.0180492	-0.146841	-0.118179	0.0862624
RN7SL417P	grey	0.0858573	-0.129492	-0.429824	0.316555
RN7SL477P	grey	-0.215369	0.215474	0.097955	0.0270747
RN7SL566P	grey	-0.135869	-0.186679	0.199685	-0.170492
RN7SL619P	grey	-0.128886	-0.0852399	0.105479	-0.0111024
RNA5SP290	grey	0.102468	-0.134204	-0.207547	0.0679629
RNA5SP39	grey	0.13079	-0.25934	-0.340599	0.235019
RNASE4	grey	-0.159514	0.119266	0.170049	-0.141655
RNASET2	grey	-0.289771	0.0405337	0.339993	-0.188024
RNF170	grey	-0.0428089	0.0198167	0.102882	-0.113408
RNF26	grey	-0.0715903	0.0727276	0.386347	-0.26332
RNU1-36P	grey	0.0676028	0.0392654	-0.0825205	-0.00944221
RNU4-62P	grey	0.00828769	-0.00647168	-0.198112	0.562529
RNU6-564P	grey	-0.165731	-0.0956077	0.147339	-0.157755
RNU6-658P	grey	-0.242448	-0.0611376	0.0813929	-0.0658785
RNU6ATAC	grey	0.0603066	-0.0336634	-0.0941543	0.0400399
RNY1	grey	0.0407054	-0.0408489	-0.117132	0.0474533
RNY1P13	grey	0.00956354	-0.0917317	-0.0119504	-0.0506704
ROR1	grey	0.533354	-0.154717	-0.659423	0.255876
ROR2	grey	0.750433	-0.243229	-0.49515	0.211844
RPH3A	grey	0.0641331	0.123866	-0.374269	0.2004
RPH3AL	grey	-0.286398	0.727772	0.0312977	-0.0935007
RPL17	grey	-0.179638	0.670206	0.229764	0.0578763
RPL21P11	grey	0.0194654	0.427583	0.10255	0.087635
RPL21P3	grey	0.19643	0.154743	-0.25964	0.237747
RPL23AP25	grey	0.0431838	-0.0328437	0.0403625	0.04712
RPL31P7	grey	-0.253952	-0.101932	0.182766	0.00758041
RPL39P18	grey	-0.0860278	0.0818877	0.0704329	-0.0144316
RPL41P5	grey	-0.186252	0.595955	0.351945	-0.050649
RPL5P24	grey	-0.0609466	0.288248	0.121006	0.0686637
RPL7AP50	grey	-0.235487	0.541494	0.332096	-0.110029
RPL7P15	grey	0.0194911	0.108339	-0.0229369	0.257238
RPS11P7	grey	0.100965	-0.108208	-0.0169865	0.0566547
RPS12P23	grey	-0.143188	0.239128	0.183897	0.141297
RPS12P31	grey	-0.114785	0.0304521	0.312878	-0.223249
RPS15AP17	grey	-0.186986	0.28003	0.169156	0.0596421
RPS17P1	grey	0.212367	0.0861208	-0.394659	0.307957
RPS20P2	grey	-0.146589	-0.0981586	0.188503	-0.0404734
RPS27AP2	grey	-0.172057	0.224936	0.177547	0.0839923
RPS27AP6	grey	-0.0378899	0.39435	-0.0288707	0.25036
RPS29P16	grey	-0.122857	0.119255	0.253655	-0.0651938
RPS2P28	grey	-0.162762	0.319917	0.278649	-0.0572824
RPS2P5	grey	-0.208864	0.636146	0.28261	-0.0574242
RPS3AP46	grey	-0.189724	0.195407	0.130335	-0.139883
RPS4XP6	grey	-0.139913	0.295818	0.20185	0.0318564
RPS6KA2-IT1	grey	0.0499463	0.00731584	0.0263165	0.0731191
RPSAP5	grey	-0.0937586	0.347734	0.146175	0.258645
RPSAP54	grey	-0.287811	0.367876	0.279229	0.0502895
RPSAP61	grey	-0.225721	0.474184	0.345496	-0.0701015
RRAS	grey	-0.223496	-0.124379	0.504347	-0.328484
RRAS2	grey	-0.142027	0.0207336	0.32385	-0.272176
RRNAD1	grey	-0.574566	0.278353	0.655674	-0.430941
RRP7A	grey	-0.377746	0.17364	0.482083	-0.0996056
RSAD1	grey	-0.181396	0.692188	0.0561531	0.114777
RSPH10B	grey	-0.134935	-0.11735	0.224047	-0.035667
RSU1P2	grey	0.244098	-0.0935668	-0.0837497	0.00959549
RTTN	grey	0.115966	-0.106153	-0.244584	0.28402
RUNDC3A-AS1	grey	-0.255046	0.373272	0.148867	-0.0532852
RWDD4P2	grey	-0.144891	0.332692	0.196835	-0.313592
SALL1	grey	0.106073	0.24199	-0.0435566	-0.135791
SAMD3	grey	0.335378	-0.173016	-0.758065	0.665122
SART3	grey	0.0845958	-0.225375	-0.09545	0.0466623
SCAMP1	grey	0.298236	-0.209225	-0.243604	-0.164115
SCEL	grey	-0.115878	-0.062377	0.315294	-0.261128
SCGB1D2	grey	-0.169578	0.185001	0.073953	-0.0605365
SCO2	grey	-0.264396	0.153194	0.420135	-0.0694551
SCRIB	grey	-0.47245	0.0685651	0.653562	-0.421232
SCUBE3	grey	0.468549	-0.180343	-0.124008	-0.0460366
SDHAF3	grey	-0.251882	0.0673855	0.317119	-0.256164
SEC11A	grey	-0.00122505	0.243709	0.330049	-0.280318
SEC14L1	grey	0.44491	-0.021353	-0.550455	0.330114
SELENOW	grey	-0.212199	0.0776033	0.438078	-0.211799
SELPLG	grey	0.0984012	-0.235667	-0.169164	0.368075
SEMA4D	turquoise	0.0758185	-0.199539	-0.463347	0.804342
SEMA5A	grey	0.71444	-0.146593	-0.735372	0.379385
SEMA5B	grey	0.257777	0.0927541	-0.212922	0.0918464
SENP3-EIF4A1	grey	-0.117298	-0.00422598	-0.0946702	0.088532
SENP6	grey	0.24634	-0.047019	-0.554729	0.2815
SENP8	grey	0.165636	0.164946	-0.190855	-0.0391284
SERPINA12	grey	0.178398	-0.0175015	0.0173476	-0.0893438
SERPINB9	grey	0.046186	-0.216614	-0.0718909	0.384015
SETP9	turquoise	0.0975161	-0.127396	-0.423268	0.73441
SETX	grey	0.494596	-0.321462	-0.624248	0.420745
SFRP1	grey	0.397806	-0.101993	-0.633737	0.534753
SFTPD	grey	-0.238439	0.278105	0.255739	-0.116093
SFXN2	grey	-0.396866	0.455952	0.340941	-0.175988
SFXN4	grey	-0.514968	0.66681	0.555476	-0.334983
SH2B3	grey	0.565568	-0.151173	-0.797106	0.667929
SH2D2A	turquoise	0.00550461	0.00312935	-0.162982	0.571711
SH2D3A	grey	-0.560336	0.00308109	0.724276	-0.506526
SH3BP5	grey	0.614822	-0.2557	-0.743906	0.626064
SH3PXD2A	blue	0.848994	-0.27662	-0.493054	0.172144
SHROOM2	grey	-0.075502	0.074039	0.0273003	-0.128599
SIGLEC14	turquoise	0.261395	-0.164467	-0.524805	0.777204
SIGLEC8	grey	0.469964	-0.14912	-0.5153	0.382522
SIK1	grey	0.073121	-0.0596539	0.0185804	0.0158175
SIM2	grey	-0.279834	-0.141768	0.44077	-0.366319
SLA	turquoise	0.456728	-0.217906	-0.730301	0.851455
SLA2	turquoise	0.285318	-0.168069	-0.66162	0.943898
SLC10A4	grey	-0.028132	0.000870796	-0.194443	0.0855325
SLC12A6	grey	0.290734	-0.34465	-0.322241	0.221843
SLC19A3	grey	-0.0822538	-0.0578117	-0.206274	0.149197
SLC22A23	grey	-0.265461	0.132817	0.116468	-0.198028
SLC24A4	grey	0.135941	-0.129553	-0.400783	0.40607
SLC25A10	grey	-0.605787	0.471218	0.717463	-0.464594
SLC25A17	grey	-0.0570646	0.16954	0.234656	-0.146027
SLC25A22	brown	-0.393654	0.825209	0.436924	-0.301287
SLC25A3	grey	-0.205317	0.495911	0.291764	-0.104542
SLC25A32	grey	0.412008	-0.25512	-0.346952	0.244648
SLC25A39	grey	-0.476391	0.405872	0.72224	-0.381406
SLC25A5-AS1	grey	-0.287557	0.383485	-0.0567934	0.179684
SLC28A2	grey	-0.11244	-0.0221128	0.067308	-0.0726627
SLC29A3	grey	0.0541065	-0.0493073	0.00460806	0.077102
SLC2A11	grey	-0.258398	0.749636	0.0855541	0.0705021
SLC2A9	grey	0.576111	-0.120612	-0.615989	0.391492
SLC31A2	grey	0.389697	-0.0903032	-0.426999	0.374568
SLC35B2	grey	-0.140084	0.262538	0.459323	-0.381234
SLC38A11	grey	-0.0247797	0.0131455	-0.191979	0.0538877
SLC39A9	grey	0.0317142	0.0878344	0.0647079	-0.274655
SLC3A2	grey	-0.211519	0.314404	0.406655	-0.263519
SLC44A2	grey	-0.0739659	-0.0895663	0.310281	-0.180869
SLC47A1	grey	0.439403	-0.156767	-0.484659	0.351015
SLC4A11	grey	-0.295058	-0.0830251	0.46844	-0.315872
SLC4A7	grey	0.280005	-0.322077	-0.570802	0.323093
SLC6A15	grey	0.200558	-0.0486853	-0.434032	0.206976
SLC6A6	grey	0.671029	-0.349817	-0.397324	0.0833902
SLFN12L	turquoise	0.356872	-0.163212	-0.700121	0.757222
SLITRK5	grey	0.298201	-0.0206271	-0.521251	0.211941
SMARCE1P6	grey	-0.309025	0.274198	0.210189	-0.0836971
SMIM14	grey	-0.0409913	0.010937	0.100401	-0.0982615
SMOC2	grey	0.635937	-0.183451	-0.616893	0.378139
SNORA77	grey	-0.304446	-0.0184723	0.255221	-0.125869
SNRPCP3	grey	0.065717	-0.0902689	-0.0914165	0.207037
SNTB2	grey	0.690847	-0.375625	-0.564866	0.181229
SNX29P2	grey	-0.13806	-0.1424	0.0744532	-0.0886245
SNX30	grey	0.564741	-0.214903	-0.632371	0.295692
SOX8	grey	-0.0362946	0.0307362	0.0277105	0.0115326
SP2-AS1	grey	0.051592	-0.11739	0.0404641	-0.0808797
SPAG4	brown	-0.382141	0.85837	0.466661	-0.3107
SPARC	blue	0.890784	-0.252427	-0.459093	0.204329
SPARCL1	grey	0.603974	-0.164291	-0.780924	0.452612
SPATA22	grey	0.0187199	0.015199	0.0605108	0.121342
SPN	turquoise	0.378091	-0.198186	-0.744527	0.820568
SPON1	blue	0.874612	-0.259671	-0.674941	0.374824
SPRED2	grey	0.0534194	-0.160539	0.0015112	-0.242704
SPRR1B	grey	-0.143019	-0.0294187	0.325396	-0.171494
SPRR2D	grey	-0.108721	0.0362274	0.233891	-0.0844274
SPRR2E	grey	-0.0952257	-0.0124318	0.210186	-0.044344
SPRR3	grey	-0.164375	-0.0654503	0.321164	-0.168756
SPRY3	grey	0.175419	-0.176572	-0.413814	0.181786
SPTLC3	grey	-0.151563	0.016349	0.0949262	-0.175991
SRPX	grey	0.419779	-0.0694329	-0.690989	0.554161
SSFA2	grey	-0.0922271	0.237072	0.166976	-0.348453
SSTR5	grey	-0.107692	0.127163	0.124827	-0.137613
ST13P15	grey	0.167078	-0.0486987	-0.0839617	0.00365866
ST3GAL5-AS1	grey	0.187024	0.134693	-0.467514	0.349276
STARD9	grey	0.512314	-0.216278	-0.690473	0.453228
STAT4	turquoise	0.279519	-0.0798231	-0.701509	0.899415
STEAP1	grey	0.0100623	-0.18928	0.256073	-0.257533
STK3	grey	0.119065	-0.174271	0.169296	-0.315416
STK38	grey	0.25887	-0.392454	-0.152553	0.167715
STK4	turquoise	0.328117	-0.388628	-0.57894	0.75534
STN1	grey	-0.390869	0.14697	0.577186	-0.394675
STON1	grey	0.718855	-0.240648	-0.617075	0.325599
STT3B	grey	0.124062	-0.0847935	-0.105678	-0.0998355
STX11	grey	0.370956	-0.233073	-0.533432	0.597226
SUB1P3	grey	-0.0148543	-0.0599143	-0.0119305	0.255095
SVBP	grey	0.0471807	0.0791255	0.11124	0.165239
SYCE3	grey	-0.197706	0.0115238	0.299273	-0.167927
SYCP3	grey	-0.0784483	-0.18026	-0.204661	0.199748
SYNJ2	grey	0.136767	-0.160356	-0.178495	-0.0316609
SYS1-DBNDD2	grey	0.101114	-0.212201	0.0151199	0.0275337
TACC1	grey	0.406694	-0.0687839	-0.73634	0.394244
TAF15	grey	-0.220079	0.132632	0.415673	-0.172333
TAPT1-AS1	grey	-0.359178	0.0100915	0.117855	-0.150142
TATDN1	grey	-0.210969	0.225288	0.34035	-0.222901
TBC1D16	grey	0.584979	-0.00285865	-0.470032	0.295478
TBC1D24	grey	-0.209688	0.730593	0.0866528	-0.156198
TBL3	grey	-0.432686	0.322705	0.705749	-0.404984
TBX21	turquoise	0.26667	-0.111013	-0.633747	0.864234
TBX5-AS1	grey	0.425925	-0.109772	-0.307299	0.285242
TBXAS1	grey	-0.0206765	-0.0739543	-0.043287	0.0536807
TCEA1	grey	0.00297748	-0.0545296	0.185053	-0.155038
TEAD4	grey	-0.21075	0.73007	0.416715	-0.278099
TECTB	grey	-0.181309	-0.140828	0.127931	-0.144026
TEFM	grey	-0.162065	0.0236718	0.161045	-0.013441
TEKT3	grey	0.143222	-0.0248614	-0.180984	0.148318
TENM4	blue	0.850223	-0.294335	-0.498473	0.231653
TFAP2C	grey	-0.206308	0.00366434	0.351984	-0.254498
TFF2	grey	-0.184216	0.00135583	0.113068	-0.155167
TGFB3	blue	0.814405	-0.145393	-0.564492	0.322727
TGM1	grey	-0.207871	0.0965719	0.251022	-0.0797594
TGOLN2	grey	0.181867	-0.205586	-0.214328	-0.0852545
THAP6	grey	-0.0871044	-0.0776488	-0.0851737	-0.107218
THEM4	grey	-0.213494	0.338676	0.0099074	0.126236
THEMIS2	turquoise	0.364556	-0.214343	-0.536898	0.730748
THUMPD3	grey	-0.134097	-0.151067	0.213341	-0.295483
TIMM17B	grey	-0.422889	0.128574	0.729006	-0.369475
TIMP1	grey	0.110671	-0.00341936	-0.0542575	0.173934
TIMP4	grey	0.14847	-0.0522522	-0.380108	0.393702
TIPARP-AS1	grey	-0.40611	0.613945	0.527101	-0.257279
TK2	grey	-0.0646411	-0.102292	0.237693	-0.238027
TKFC	grey	-0.512538	0.277549	0.607481	-0.33877
TLCD1	grey	-0.387373	0.288229	0.638996	-0.425219
TLE4	grey	0.415266	-0.243177	-0.693287	0.481044
TLN1	grey	0.0403694	-0.0592183	-0.0222518	-0.00862039
TM6SF1	grey	0.60696	-0.206379	-0.812268	0.579069
TMED3	grey	-0.331211	0.768858	0.532246	-0.392807
TMED4	grey	-0.412911	0.263913	0.590327	-0.486952
TMED8	grey	0.325428	-0.139839	-0.657568	0.472062
TMEM101	grey	-0.332083	0.474255	0.582981	-0.308449
TMEM106B	grey	0.235488	-0.196575	-0.108072	-0.177438
TMEM114	grey	-0.223278	-0.116537	0.296344	-0.222061
TMEM117	grey	0.30385	-0.147608	-0.136006	-0.0317292
TMEM119	grey	0.664011	-0.180899	-0.697754	0.557566
TMEM168	grey	0.0614129	-0.194965	-0.0971568	-0.0253354
TMEM200C	grey	0.770622	-0.299022	-0.498091	0.455655
TMEM230	grey	0.0669384	0.0962768	0.145619	-0.1229
TMEM248	grey	0.0278817	-0.114661	0.212558	-0.249994
TMEM249	grey	-0.262316	-0.020652	0.280602	-0.0535888
TMEM52	brown	-0.231837	0.984996	0.212021	-0.145494
TMEM67	grey	0.207354	-0.0951472	-0.0135786	-0.205877
TMEM86B	grey	-0.273224	-0.0423438	0.228337	0.0609538
TMSB4XP1	grey	0.094509	-0.0369529	0.0756848	0.0393157
TMUB1	grey	-0.558102	0.34316	0.713393	-0.376415
TNFSF10	grey	-0.0838898	-0.0680555	0.145513	-0.0575057
TNFSF12-TNFSF13	grey	0.168345	-0.0729475	-0.215371	0.238891
TNRC18P1	grey	-0.00790612	-0.0669979	-0.100405	0.166424
TOB1	grey	-0.247359	-0.0516052	0.416845	-0.462648
TOE1	grey	-0.199491	0.0822333	0.121244	0.148756
TPCN1	grey	-0.0280079	0.119386	-0.0533622	0.0419944
TPI1P2	grey	-0.0306295	0.186771	-0.173368	0.109949
TPK1	grey	0.272	-0.295108	-0.411697	0.348812
TPMT	grey	-0.148351	-0.0582232	0.102109	-0.152587
TPP1	grey	0.582208	-0.252567	-0.55529	0.321757
TPRG1-AS2	grey	-0.0767906	-0.0735992	0.229112	-0.056516
TPT1P12	grey	-0.144248	0.303381	0.0384829	-0.0440819
TRAF1	turquoise	0.190506	-0.175773	-0.54212	0.879788
TRAF3	grey	0.105182	-0.204006	-0.25116	0.448422
TRAV10	turquoise	0.202281	-0.202833	-0.493889	0.78806
TRAV24	grey	0.270954	-0.150668	-0.547583	0.531101
TRAV26-1	turquoise	0.207047	-0.149676	-0.572897	0.8428
TRAV34	grey	0.1144	-0.141574	-0.320485	0.337205
TRAV38-1	turquoise	0.19129	-0.15224	-0.502966	0.803408
TRAV8-4	turquoise	0.295712	-0.157974	-0.615117	0.930017
TRBJ2-7	turquoise	0.212253	-0.151605	-0.409279	0.692213
TRBV12-4	turquoise	0.24218	-0.143771	-0.477978	0.75764
TRBV6-4	grey	0.0746588	0.221646	-0.322447	0.482487
TRG-AS1	turquoise	0.287108	-0.0457455	-0.667686	0.885224
TRGC1	grey	0.242628	-0.185077	-0.589103	0.671723
TRGC2	grey	0.331178	-0.100331	-0.57088	0.604148
TRGV10	grey	0.353687	-0.116264	-0.66181	0.55868
TRIL	grey	0.614139	-0.166107	-0.413564	0.281387
TRIM5	grey	-0.0295462	-0.00255149	0.00859136	-0.061386
TRIM55	grey	0.0905488	-0.077131	-0.364403	0.300984
TRMT61B	grey	-0.0634365	-0.195476	-0.00108777	-0.0584049
TRPC6	grey	0.387237	-0.14532	-0.675576	0.481777
TRPM8	grey	-0.00359373	0.0129104	0.112134	-0.0929093
TRPT1	grey	-0.55995	0.460221	0.73998	-0.403651
TSG101	grey	-0.253659	0.02778	0.528522	-0.417888
TSGA10	grey	-0.37532	0.152584	0.176336	-0.229319
TSKS	grey	0.324966	-0.1318	-0.390087	0.522138
TSPAN18	grey	0.437818	-0.17047	-0.380995	0.20602
TSPOAP1-AS1	turquoise	0.122549	-0.129957	-0.468193	0.83981
TTC27	grey	-0.187041	0.268928	0.366239	-0.202271
TTC29	grey	0.0915213	-0.052109	0.00130167	-0.0315753
TTC9C	grey	-0.230449	-0.1862	0.455602	-0.302031
TTLL2	grey	-0.154665	-0.0496665	0.142966	-0.147778
TUB	grey	0.629444	-0.105553	-0.807132	0.448891
TUBA3D	grey	-0.0790563	-0.143809	-0.153769	0.465993
TUBB8P2	grey	-0.109477	-0.0102668	0.129099	-0.0982618
TUBBP6	grey	0.0609981	-0.0156616	-0.140636	0.136367
TUBG1	grey	-0.351258	0.335465	0.604364	-0.39588
TYSND1	grey	-0.522906	0.384198	0.618694	-0.193467
UBA5	grey	-0.251628	0.575126	0.172675	-0.206303
UBASH3A	turquoise	0.158648	-0.121754	-0.512752	0.917573
UBE2H	grey	0.00112688	-0.104609	0.322699	-0.380156
UBE2N	grey	0.0493294	-0.125452	0.0308824	0.0874577
UBQLN2	grey	0.47861	-0.381023	-0.320725	0.0246889
UBR7	grey	0.258843	0.00221413	-0.306348	0.15907
UCP1	grey	0.0925934	0.0218834	-0.313483	0.324833
UGT2B11	grey	0.0486905	-0.0441204	0.00508393	-0.058932
UHRF1BP1L	grey	0.59065	-0.280456	-0.648683	0.289386
UNC13C	grey	-0.0588497	-0.118226	-0.150751	0.0413823
UNC50	grey	-0.0741667	-0.0228467	0.210113	-0.264194
UPK2	grey	-0.167243	-0.0466037	0.331067	-0.211986
UPK3B	grey	-0.107636	-0.00784709	0.204143	-0.0756395
USE1	grey	-0.325909	0.539456	0.493291	-0.120878
USP24	grey	0.0989831	-0.170674	-0.333372	0.153561
USP40	grey	-0.301696	0.120262	0.301113	-0.245404
UTS2	grey	0.0372631	-0.0916076	-0.0682426	0.057016
UXT-AS1	grey	-0.255004	0.232397	0.231343	-0.259483
VASH1	grey	0.69047	-0.20917	-0.752656	0.57538
VCAN	blue	0.85161	-0.293487	-0.446685	0.12354
VEGFD	grey	0.0677313	0.0362847	-0.332555	0.33573
VIM	grey	0.547404	-0.134669	-0.420292	0.451098
VN1R48P	grey	-0.294935	0.0564815	0.130976	-0.200352
VN1R84P	grey	-0.0950262	0.0119494	0.121167	-0.138493
VPS4B	grey	0.0817235	-0.155116	-0.136415	-0.013512
VSTM4	blue	0.912861	-0.275421	-0.642625	0.328677
WBSCR27	grey	-0.214834	0.170598	0.370032	-0.289524
WDR74	grey	-0.488981	0.37507	0.678763	-0.16961
WDR81	grey	0.5959	-0.1744	-0.602366	0.600524
WIZ	grey	-0.0732264	0.101459	0.339384	-0.253669
WNT10B	grey	0.0841	-0.127834	-0.32154	0.559216
WNT9B	grey	0.319714	-0.0857658	-0.415336	0.353181
XAF1	grey	-0.0258251	-0.258025	-0.0117034	0.0105535
XCR1	turquoise	0.319635	-0.171386	-0.752947	0.768988
ZBED2	grey	-0.100135	-0.0329742	0.31034	-0.128944
ZBTB24	grey	0.300442	-0.0448089	-0.670939	0.685801
ZCCHC24	blue	0.842802	-0.26221	-0.818124	0.465911
ZFHX4	blue	0.926684	-0.282998	-0.67048	0.270254
ZFHX4-AS1	blue	0.756986	-0.214287	-0.400294	0.209178
ZFP91	grey	0.354698	-0.224864	-0.176208	-0.126781
ZFP92	grey	0.728661	-0.180501	-0.635265	0.413489
ZKSCAN8	grey	0.406679	-0.142311	-0.620143	0.276621
ZNF184	grey	0.243793	-0.228743	-0.193826	0.0104563
ZNF192P1	grey	-0.329431	0.12239	0.302961	-0.191346
ZNF222	grey	0.335721	-0.178466	-0.41054	0.390827
ZNF230	grey	0.344149	-0.266004	-0.431734	0.39776
ZNF257	grey	0.201076	0.00502611	-0.441818	0.339249
ZNF280A	grey	0.0499283	-0.0337426	0.0516447	-0.111993
ZNF286A	grey	0.115309	-0.0809761	-0.199371	0.161556
ZNF334	grey	-0.305414	0.0905221	0.229525	-0.238867
ZNF341	grey	-0.357541	-0.0135884	0.531419	-0.244478
ZNF341-AS1	grey	-0.195086	0.0415909	0.437923	-0.32954
ZNF354C	grey	0.654194	-0.138582	-0.811927	0.434525
ZNF365	grey	0.0594863	-0.0990038	0.121329	-0.119728
ZNF385D	grey	0.128614	-0.0659597	-0.345226	0.246611
ZNF444P1	grey	-0.394436	0.100186	0.468087	-0.405366
ZNF490	grey	0.398611	-0.22426	-0.594554	0.333971
ZNF518B	grey	0.535544	-0.23527	-0.764147	0.592432
ZNF551	grey	0.265534	-0.0765136	-0.406223	0.293685
ZNF558	grey	-0.235849	-0.0924361	0.178276	-0.173841
ZNF587	grey	-0.21602	-0.201278	0.214353	-0.335753
ZNF701	grey	0.118836	-0.222769	-0.132896	0.0260743
ZNF706	grey	-0.426467	0.19172	0.613776	-0.390093
ZNF75D	grey	-0.184979	-0.0615435	-0.110053	0.145336
ZNF840P	grey	-0.206957	-0.0200498	0.11113	-0.109957
ZNHIT3	grey	-0.226506	0.209974	0.464783	-0.169411
ZSCAN20	grey	0.193075	-0.219335	-0.122341	-0.17091
ZSCAN21	grey	-0.0801124	0.142716	0.0174647	-0.140745
ZZEF1	grey	0.177365	0.0636579	-0.551311	0.390281
